# Supplementary material for: Splicing analyses for variants in MMR genes: best practice recommendations from the European Mismatch Repair Working Group
Source: PubMed Central journal article supplement (PMC9437034; doi:10.1038/s41431-022-01106-w), 2022-06-09
Supplement: 41431_2022_1106_MOESM4_ESM.pdf [file 41431_2022_1106_MOESM4_ESM.pdf]

***MSH2* c.211G>C**

|                                 |                                          |
|---------------------------------|------------------------------------------|
| Gene and variant                | <i>MSH2</i> c.211G>C (exon 1)            |
| Experimental approach           | TTS                                      |
| Laboratory                      | BCN                                      |
| Design                          | E1-E4                                    |
| Result of the splicing analysis | r.195_211del (p.Tyr66Serfs*10) = Δ1q(17) |

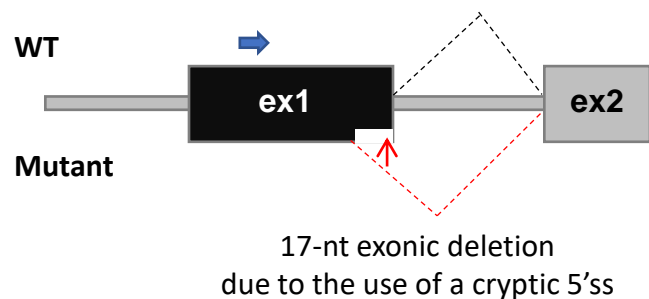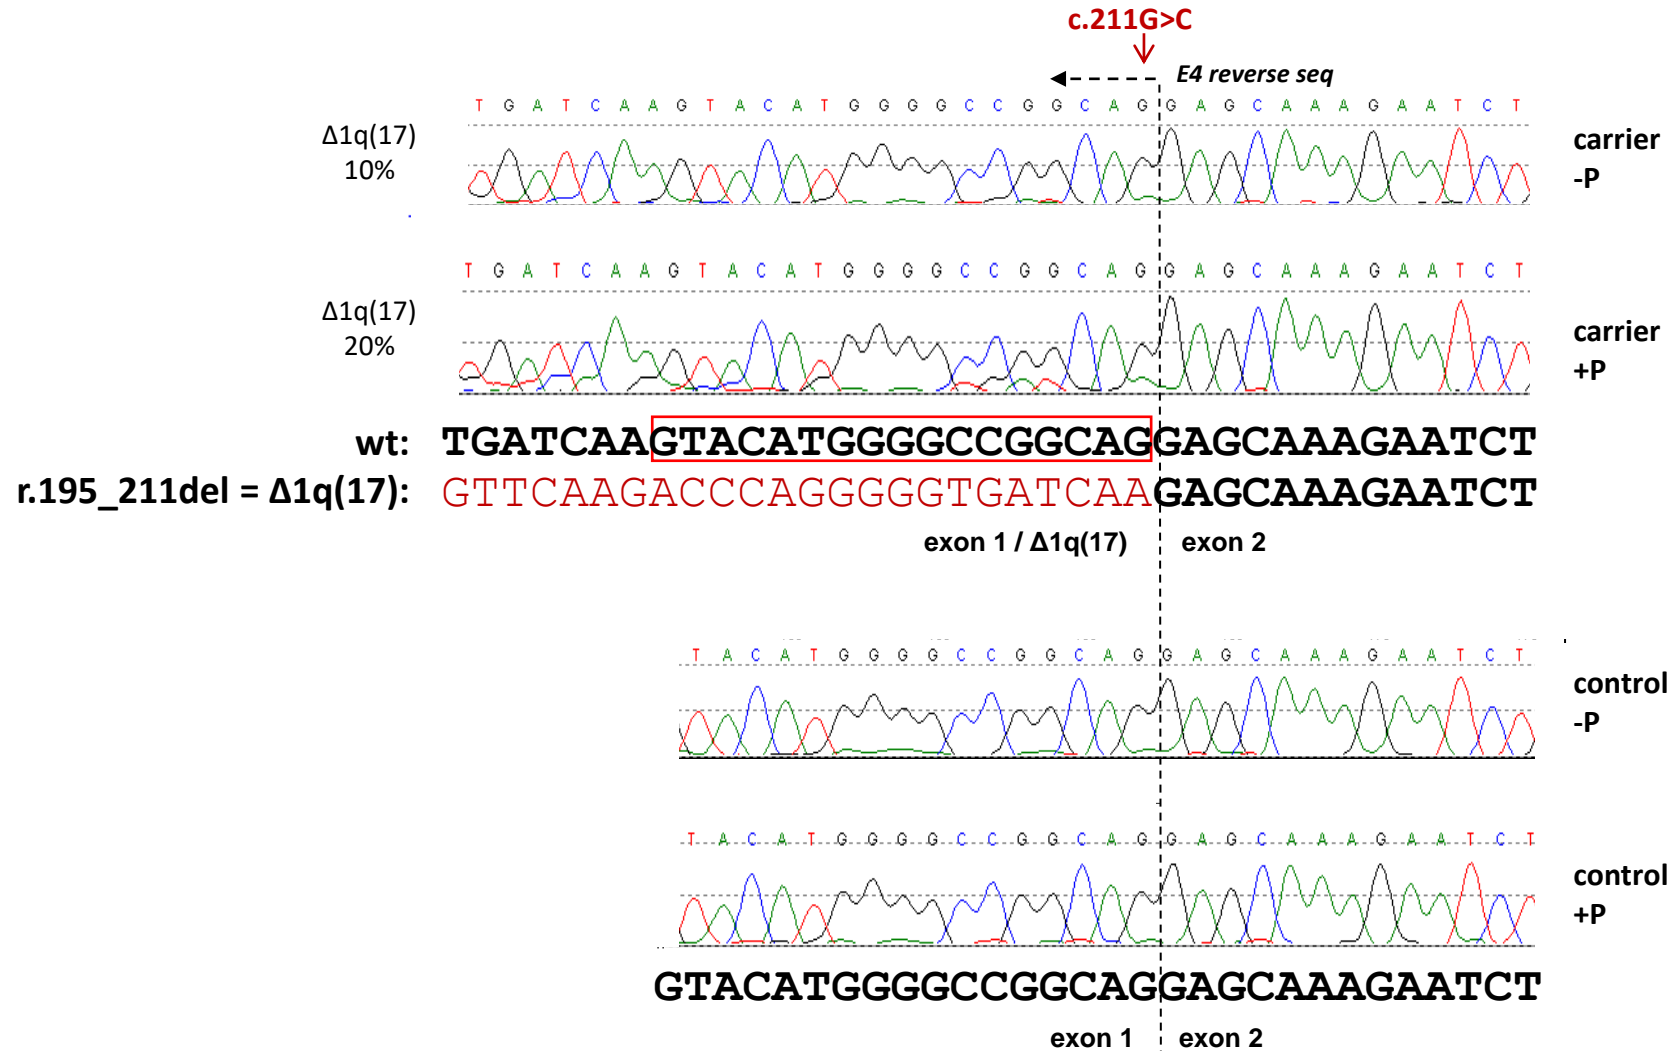

| Gene and variant                | <i>MSH2</i> c.211G>C (exon 1)                                             |
|---------------------------------|---------------------------------------------------------------------------|
| Experimental approach           | FLT                                                                       |
| Laboratory                      | MUC                                                                       |
| Design                          | E1-E16                                                                    |
| Result of the splicing analysis | r.195_211del (p.Tyr66Serfs*10) = Δ1q(17)<br>r.-16_211del (p.?) = Δ1q(227) |

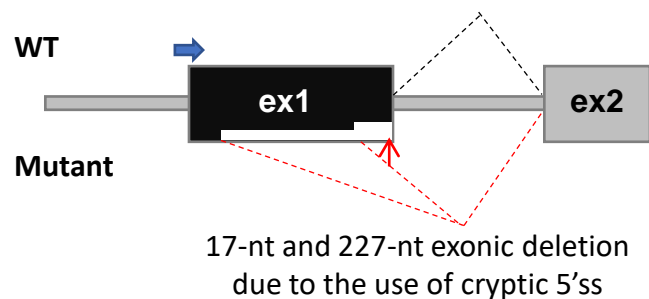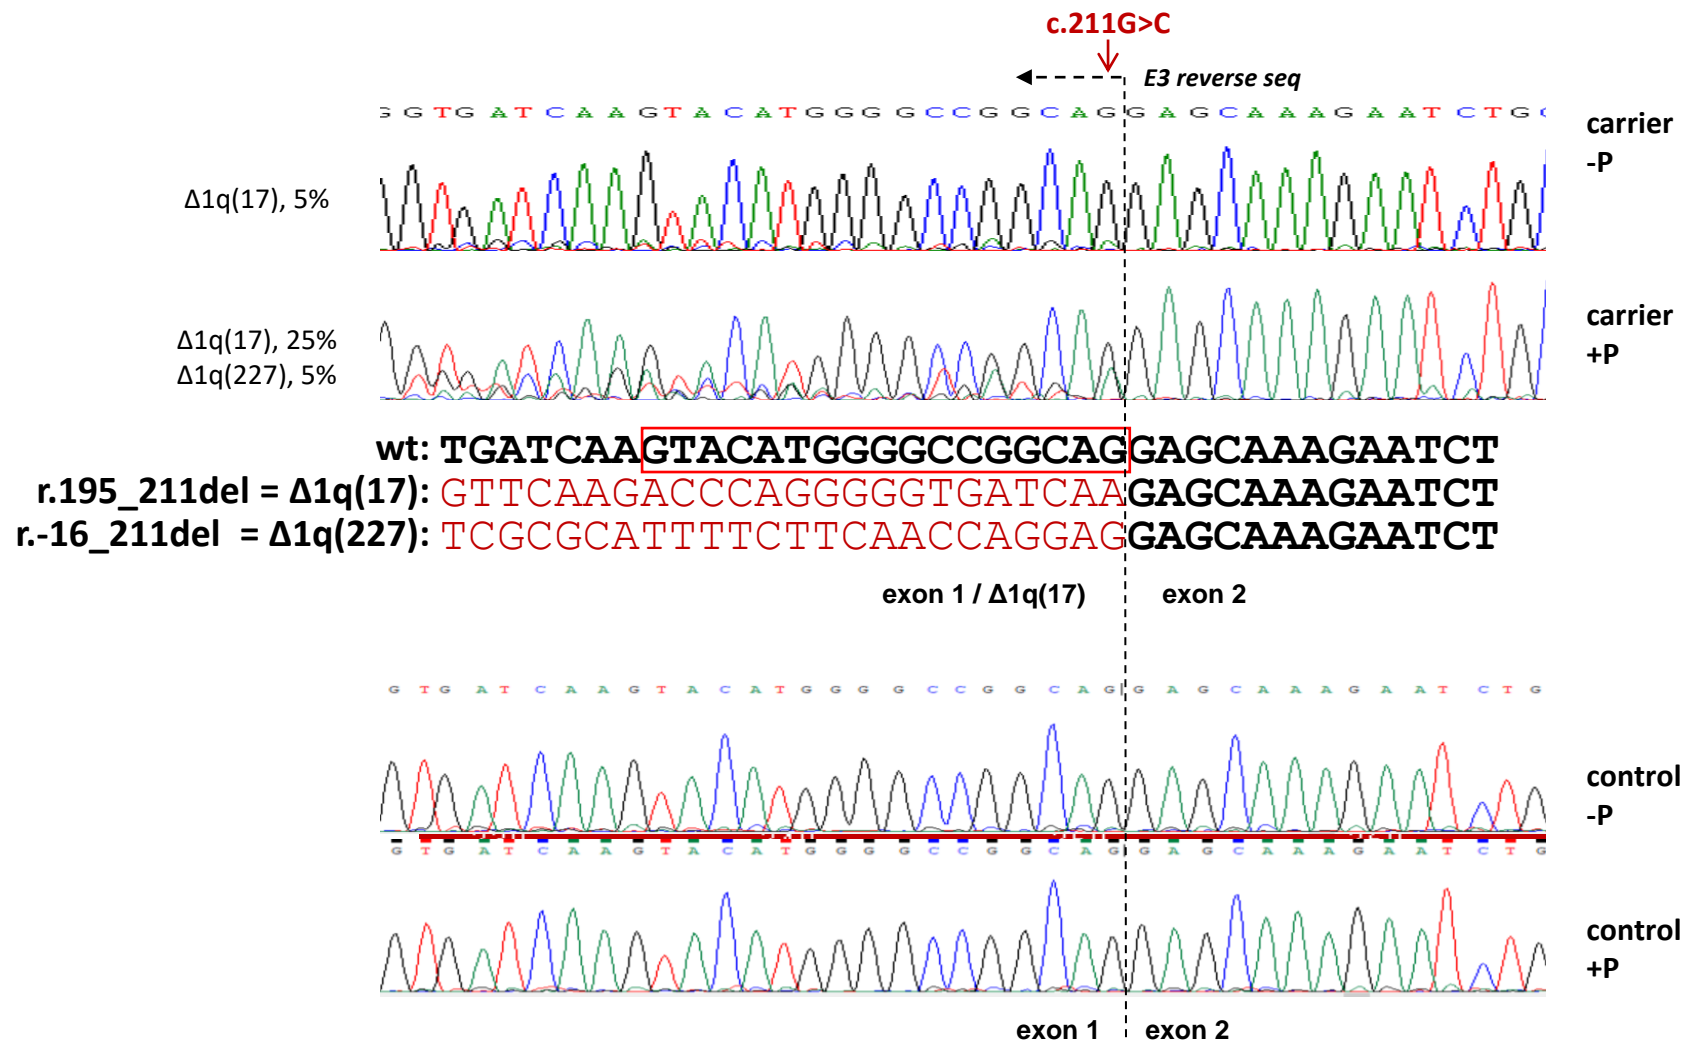

| Gene and variant                | <i>MSH2</i> c.211G>C (exon 1)                                                                                                       |
|---------------------------------|-------------------------------------------------------------------------------------------------------------------------------------|
| Experimental approach           | TTS                                                                                                                                 |
| Laboratory                      | MUC                                                                                                                                 |
| Design                          | E1-E3                                                                                                                               |
| Result of the splicing analysis | Not analysable, PCR-bias: preferential amplification of $\Delta 1q(227)$ aberrant transcript in sample (100%) and controls (10-20%) |

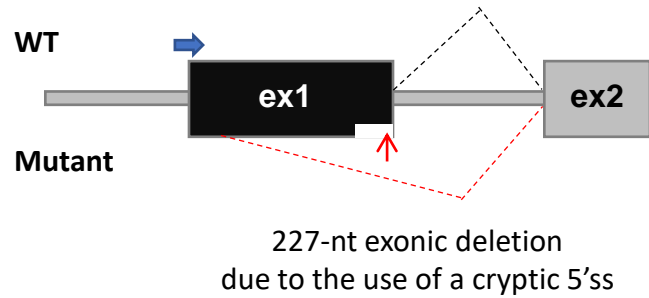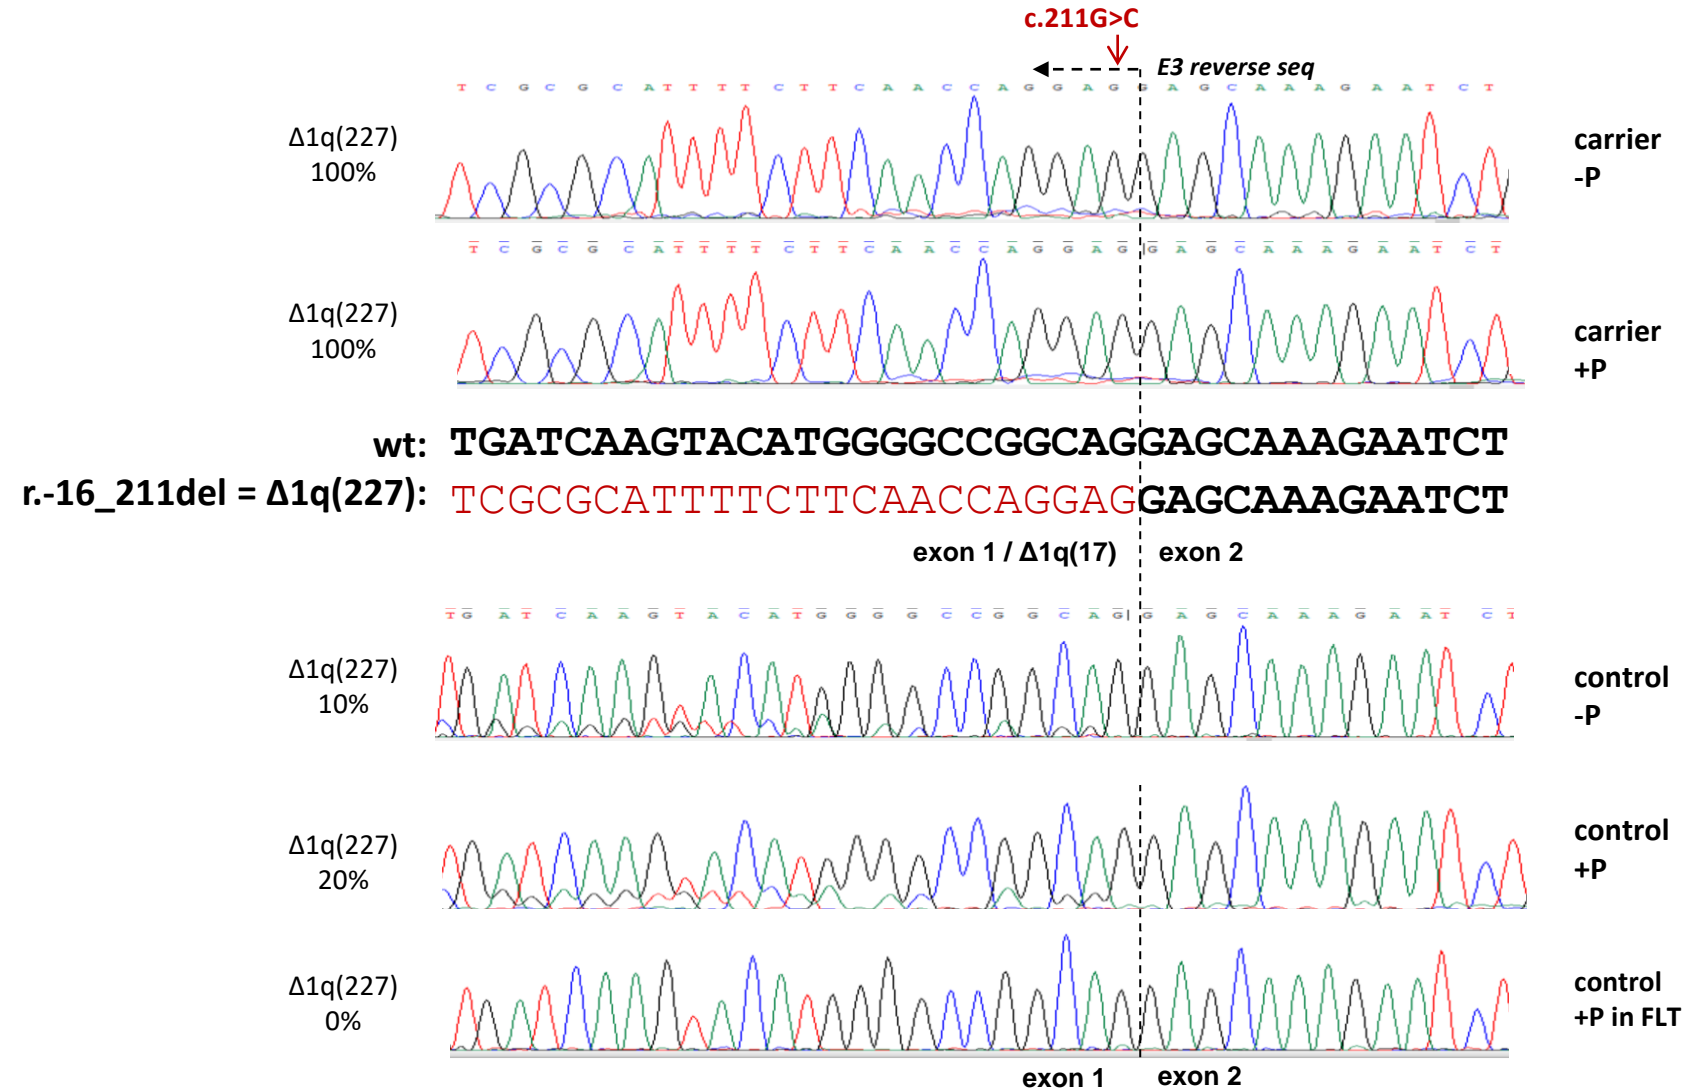

***MSH2 c.1276G>A***

|                                 |                                                 |
|---------------------------------|-------------------------------------------------|
| Gene and variant                | <i>MSH2</i> c.1276G>A (exon 7)                  |
| Experimental approach           | TTS                                             |
| Laboratory                      | BCN                                             |
| Design                          | E6-E13                                          |
| Result of the splicing analysis | r.1229_1276del48 (p.Ile411_Gly426del) = Δ7q(48) |

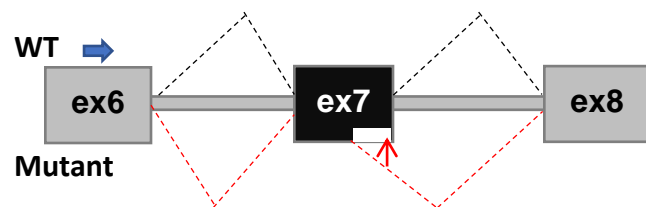

48-nt exonic deletion  
due to the use of a cryptic 5'ss

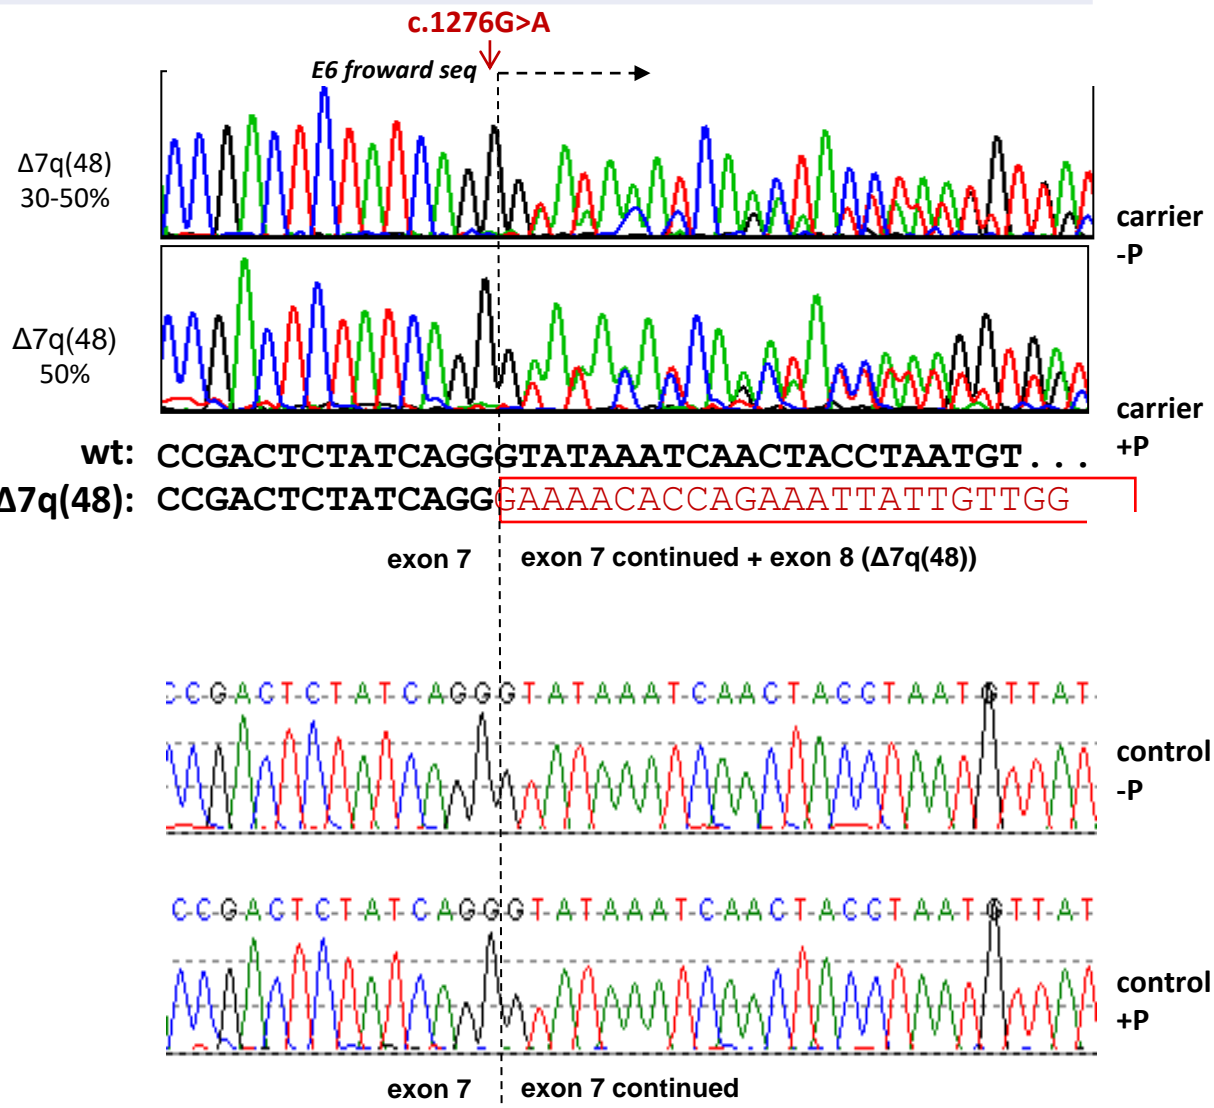

| Gene and variant                | <i>MSH2</i> c.1276G>A (exon 7)                  |
|---------------------------------|-------------------------------------------------|
| Experimental approach           | FLT                                             |
| Laboratory                      | MUC                                             |
| Design                          | E1-E16                                          |
| Result of the splicing analysis | r.1229_1276del48 (p.Ile411_Gly426del) = Δ7q(48) |

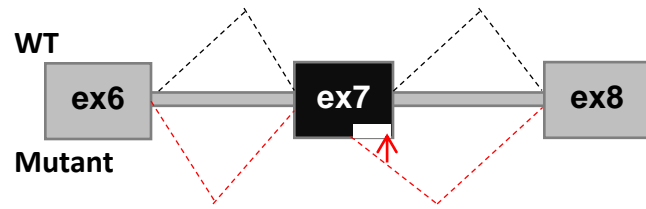

48-nt exonic deletion  
due to the use of a cryptic 5'ss

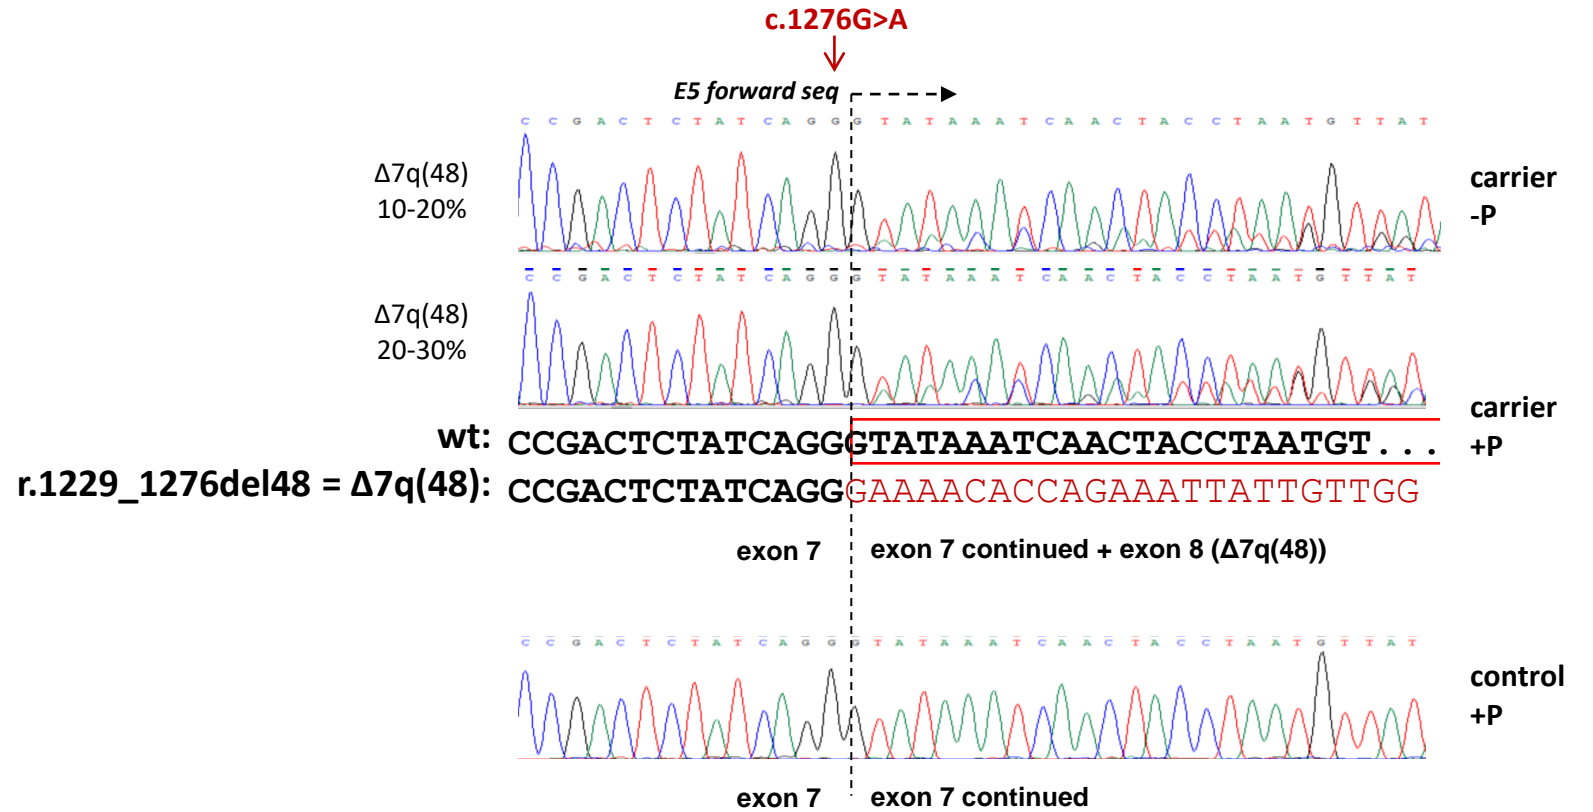

|                                 |                                                 |
|---------------------------------|-------------------------------------------------|
| Gene and variant                | <i>MSH2</i> c.1276G>A (exon 7)                  |
| Experimental approach           | TTS                                             |
| Laboratory                      | MUC                                             |
| Design                          | E5-E8                                           |
| Result of the splicing analysis | r.1229_1276del48 (p.Ile411_Gly426del) = Δ7q(48) |

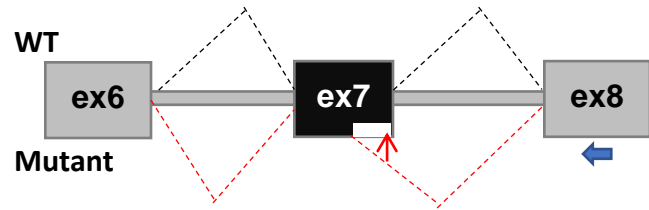

48-nt exonic deletion  
due to the use of a cryptic 5'ss

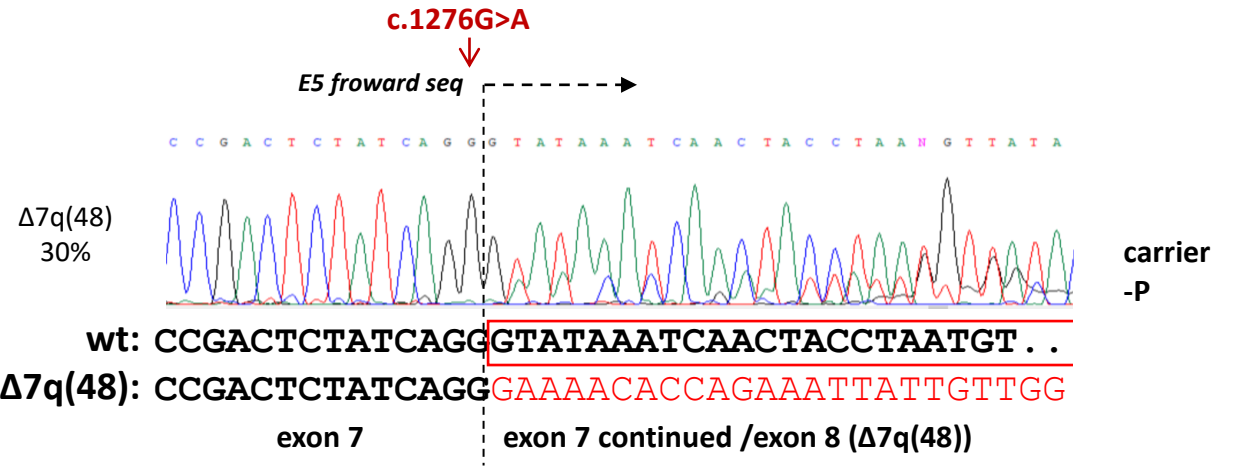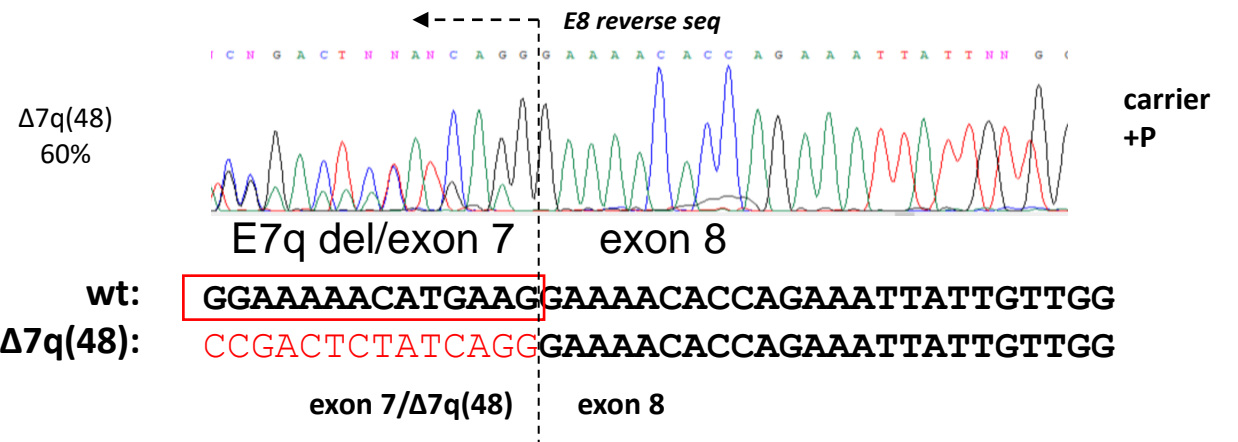



|                                 |                                               |
|---------------------------------|-----------------------------------------------|
| Gene and variant                | <i>MSH2</i> c.1276G>A (exon 7)                |
| Experimental approach           | Minigene                                      |
| Laboratory                      | URO                                           |
| Result of the splicing analysis | r.1229_1277del (p.Ile411_Gly426del) = Δ7q(48) |

**pCAS2.MSH2.ex7**

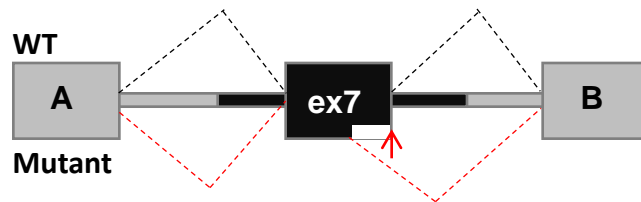

48-nt exonic deletion  
due to the use of a cryptic 5'ss

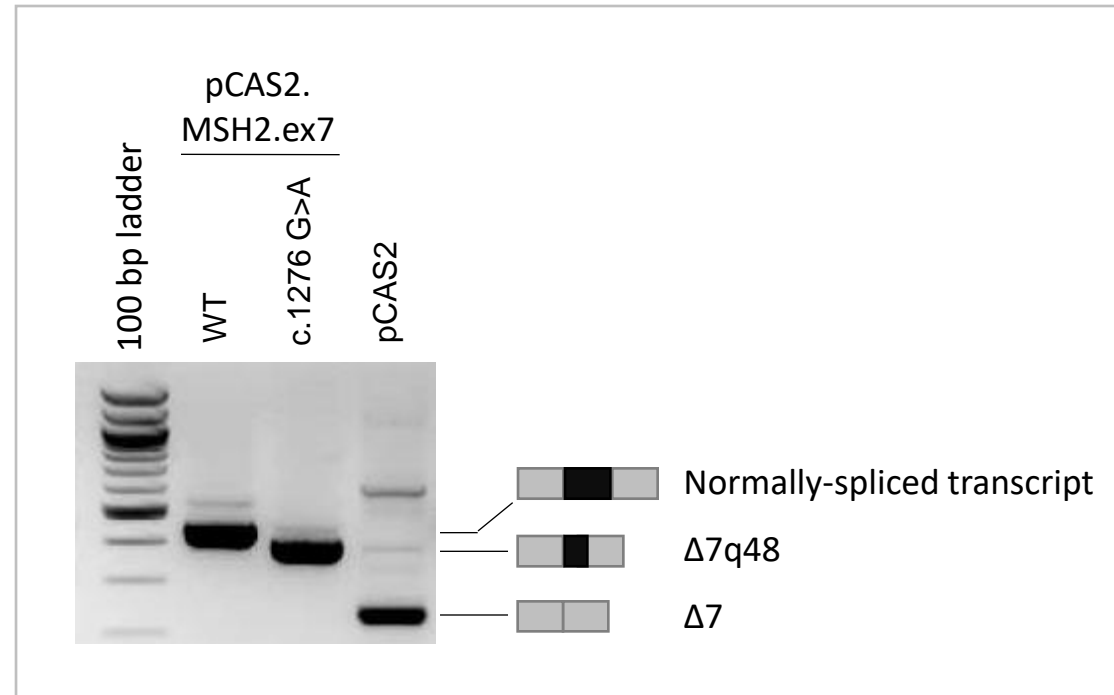

***MSH2* c.2459-12A>G**

| Gene and variant                | <i>MSH2</i> c.2459-12A>G                                |
|---------------------------------|---------------------------------------------------------|
| Experimental approach           | TTS                                                     |
| Laboratory                      | BCN                                                     |
| Design                          | E14-E16                                                 |
| Result of the splicing analysis | r.2458_2459insATTTCTTATAG (p.Gly820Aspfs*4) = ▼ 15p(11) |

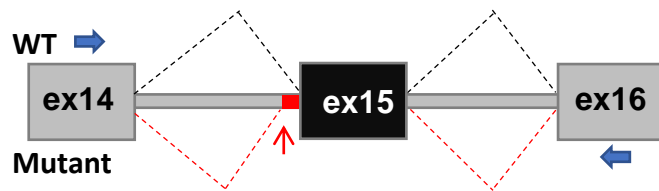

11-nt IVS14 retention  
due to the use of a *de novo* 3'ss

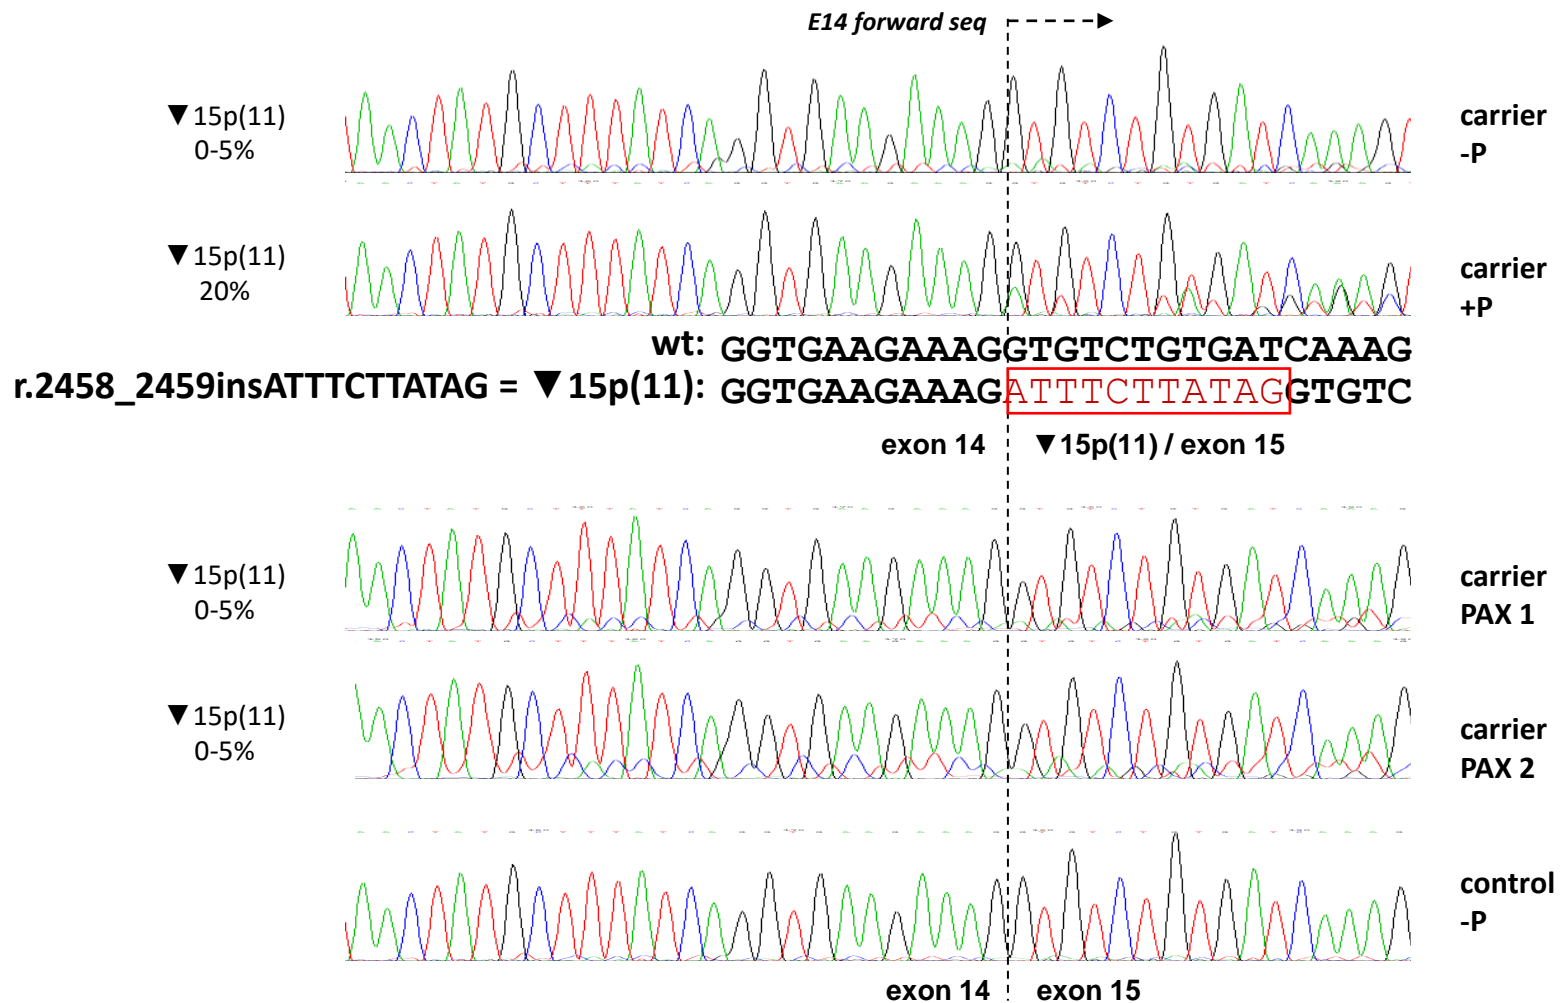

|                                 |                                                        |
|---------------------------------|--------------------------------------------------------|
| Gene and variant                | <i>MSH2</i> c.2459-12A>G                               |
| Experimental approach           | FLT                                                    |
| Laboratory                      | MUC                                                    |
| Design                          | E1-E16                                                 |
| Result of the splicing analysis | r.2458_2459insATTCTTATAG (p.Gly820Aspfs*4) = ▼ 15p(11) |

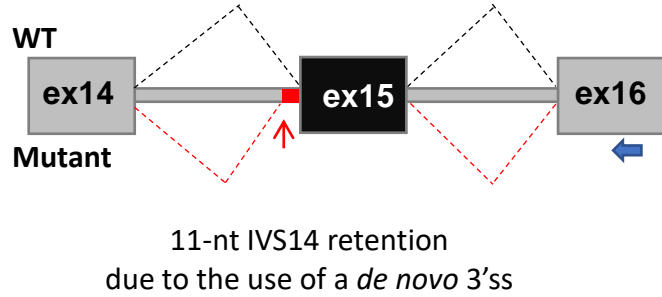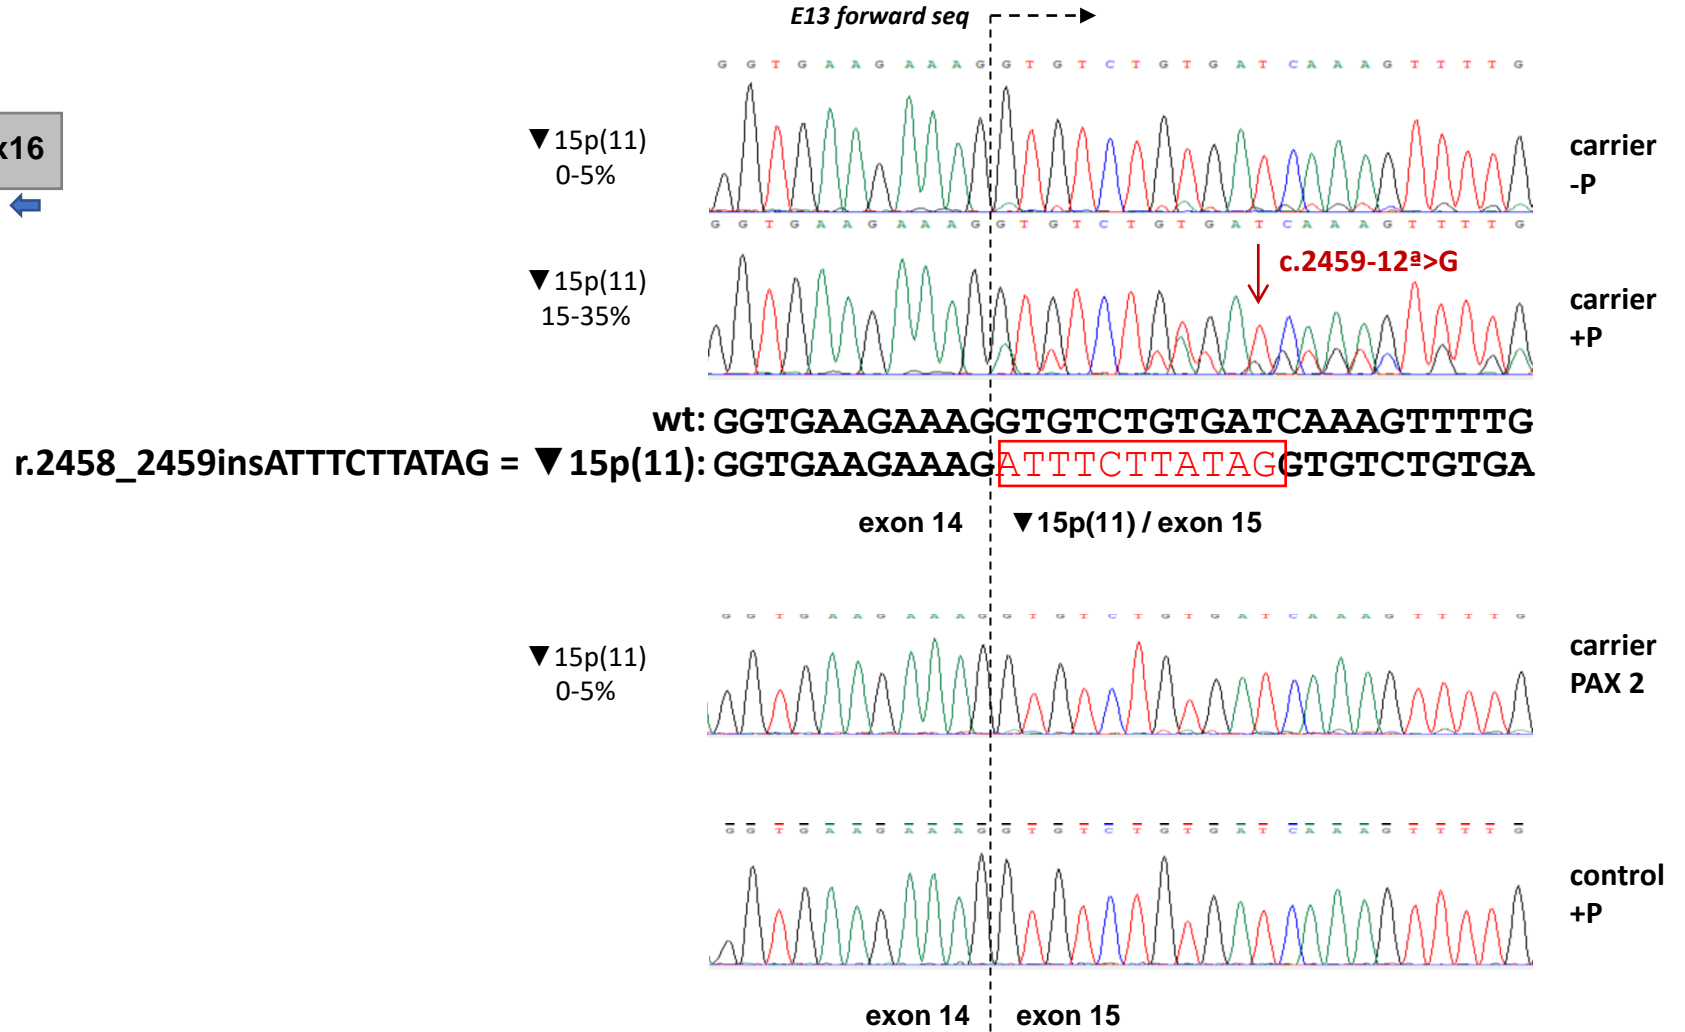

|                                 |                                                         |
|---------------------------------|---------------------------------------------------------|
| Gene and variant                | <i>MSH2</i> c.2459-12A>G                                |
| Experimental approach           | TTS                                                     |
| Laboratory                      | MUC                                                     |
| Design                          | E13-E15                                                 |
| Result of the splicing analysis | r.2458_2459insATTTCTTATAG (p.Gly820Aspfs*4) = ▼ 15p(11) |

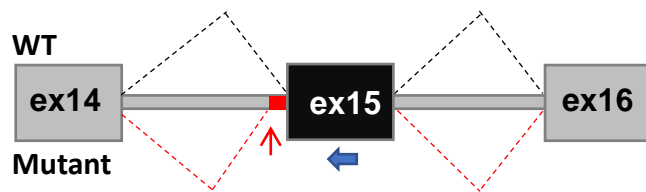

11-nt IVS14 retention  
due to the use of a *de novo* 3'ss

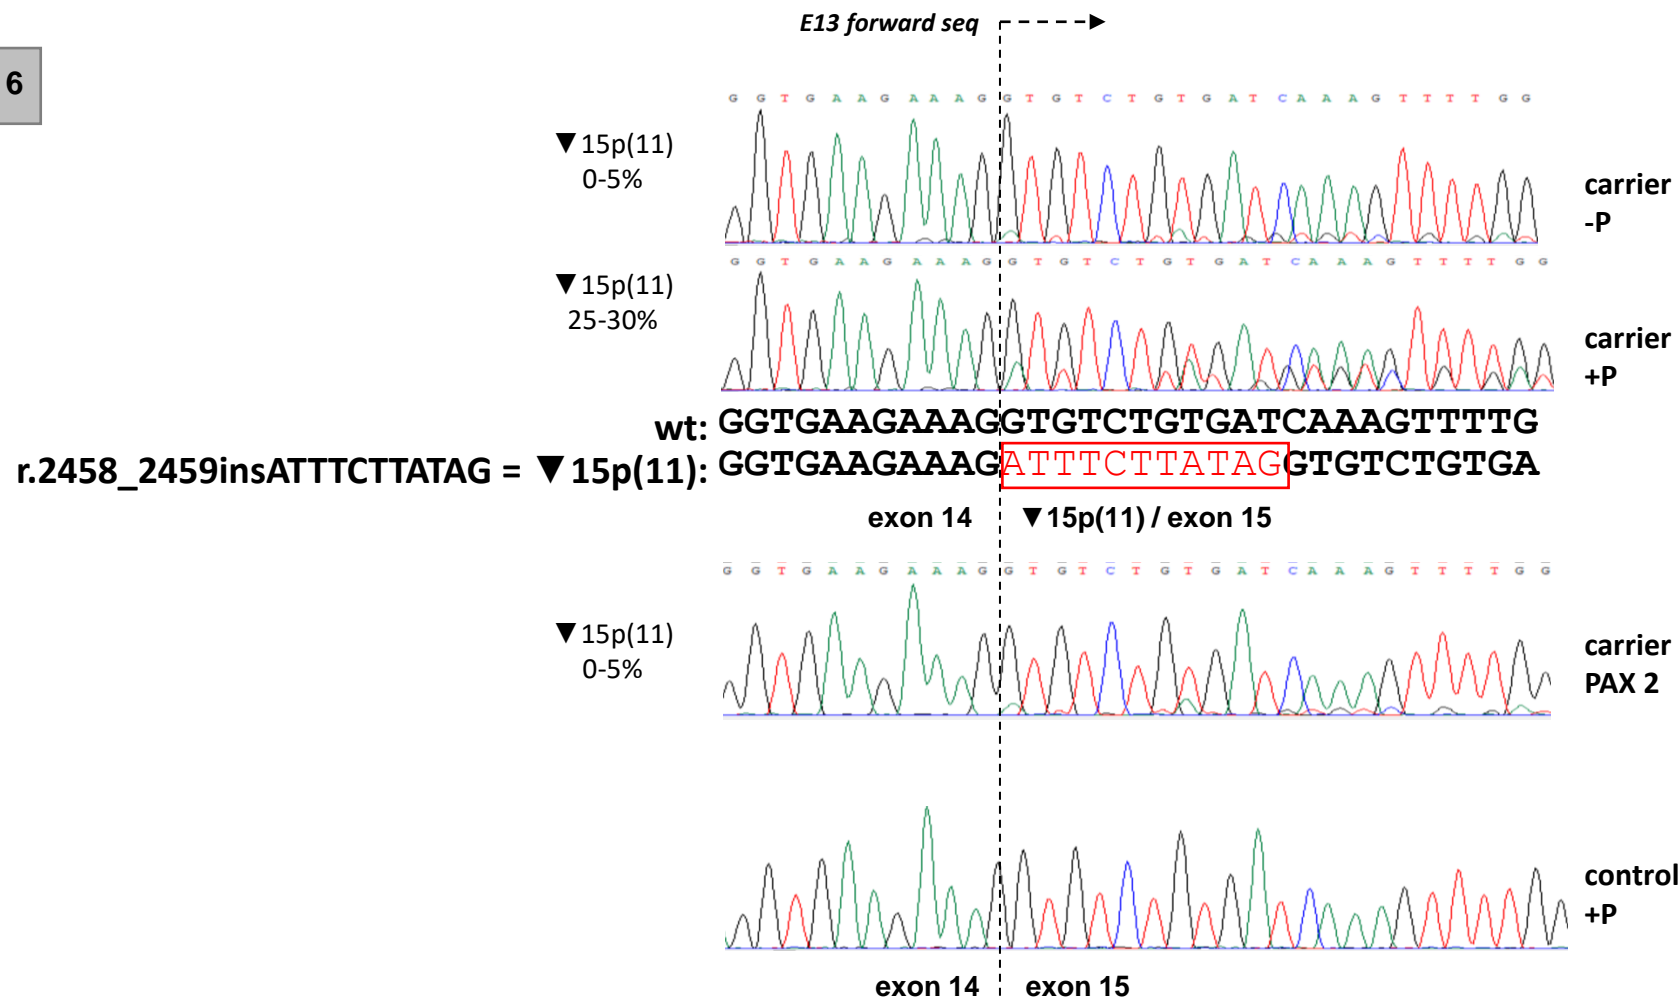

|                                 |                                                       |
|---------------------------------|-------------------------------------------------------|
| Gene and variant                | <i>MSH2</i> c.2459-12A>G                              |
| Experimental approach           | Minigene                                              |
| Laboratory                      | URO                                                   |
| Result of the splicing analysis | ▼ 15p(11), r.2458_2459insATTCTTATAG (p.Gly820Aspfs*4) |

### pCAS2.MSH2.ex15

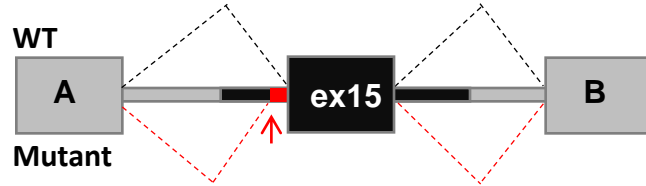

11-nt IVS14 retention  
due to the use of a *de novo* 3'ss

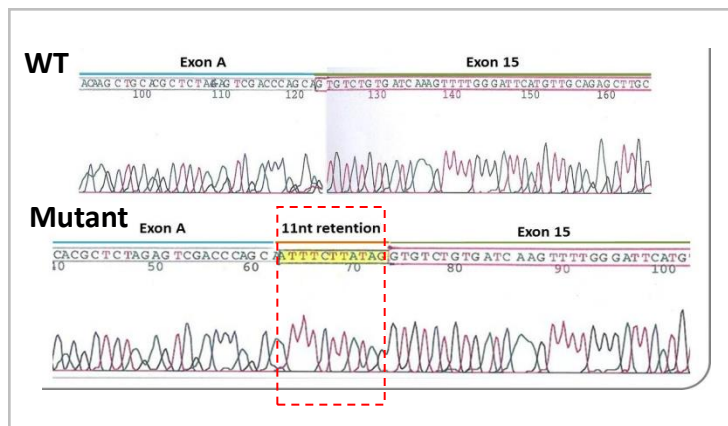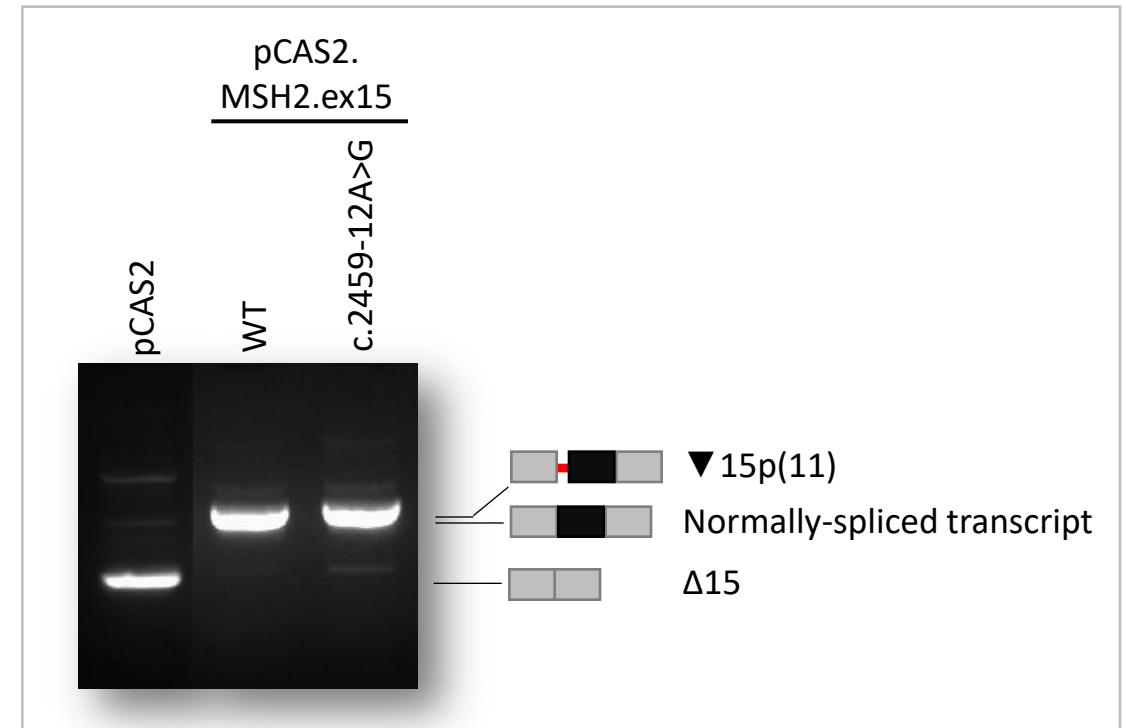

***MSH6* c.1894A>G**

|                                 |                                                                                    |
|---------------------------------|------------------------------------------------------------------------------------|
| Gene and variant                | <i>MSH6</i> c.1894A>G (exon 4)                                                     |
| Experimental approach           | TTS                                                                                |
| Laboratory                      | BCN                                                                                |
| Design                          | E3-E5                                                                              |
| Result of the splicing analysis | Not analyzable due to high level of alternative splicing of $\Delta 4$ in controls |

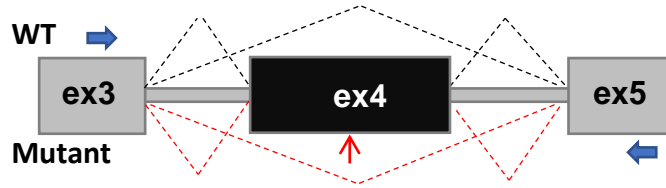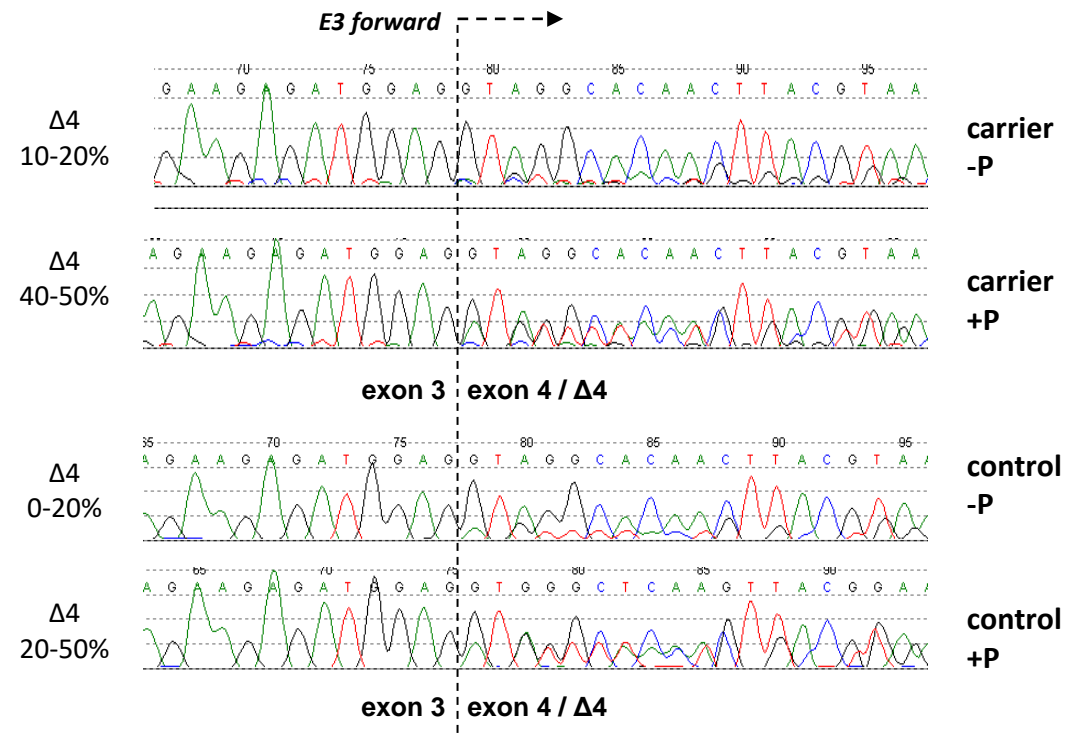



| Gene and variant                | <i>MSH6</i> c.1894A>G (exon 4)                             |
|---------------------------------|------------------------------------------------------------|
| Experimental approach           | TTS covering the whole gene                                |
| Laboratory                      | MUC                                                        |
| Design                          | E1-E4 and E3-E10                                           |
| Result of the splicing analysis | No effect on splicing; biallelic expression of the variant |

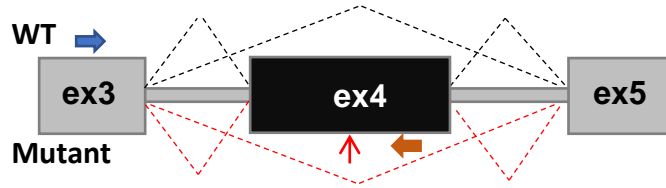

### TTS E1-4

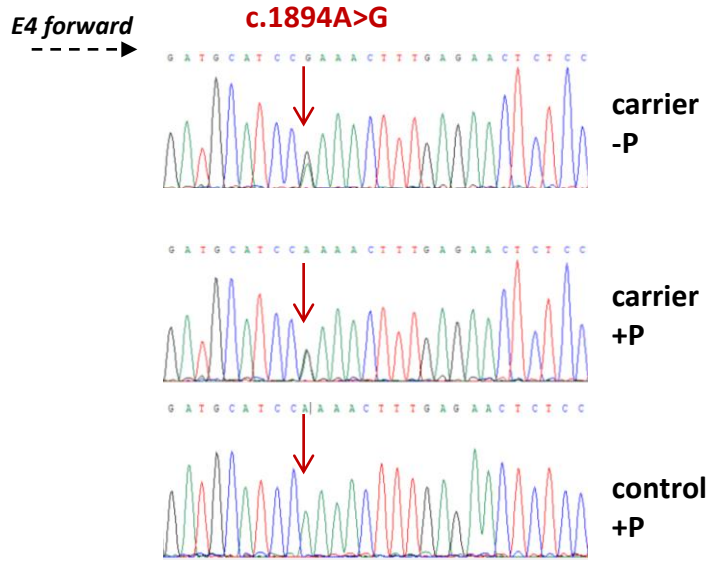

### TTS E3-10

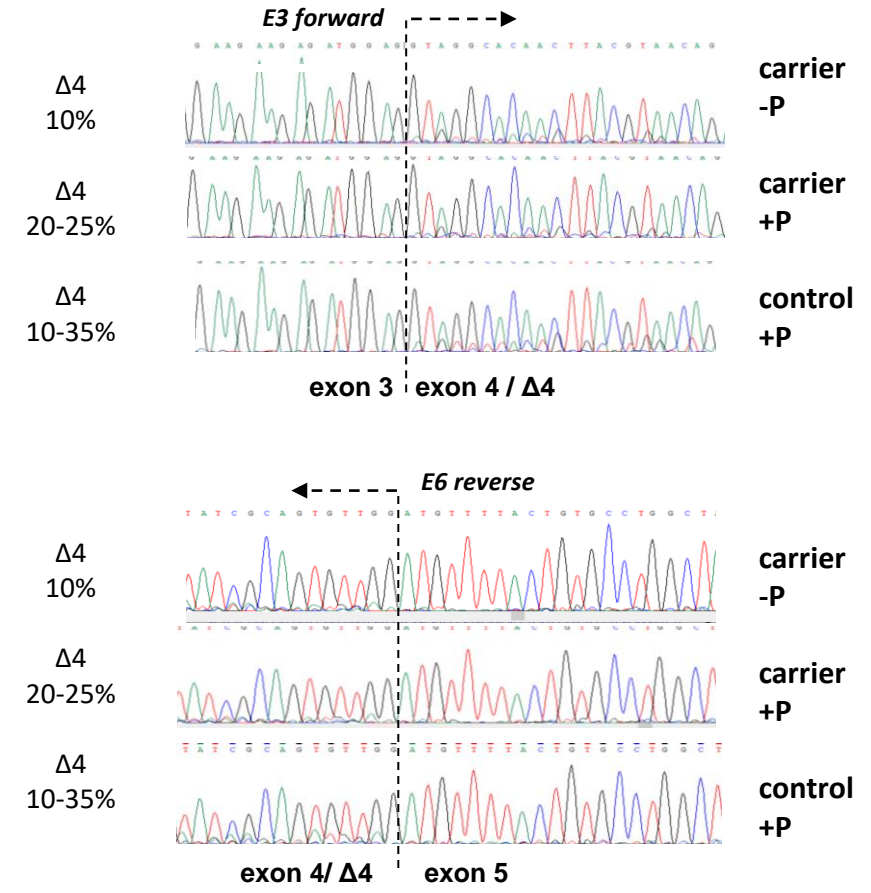

|                                 |                                                                                    |
|---------------------------------|------------------------------------------------------------------------------------|
| Gene and variant                | <i>MSH6</i> c.1894A>G (exon 4)                                                     |
| Experimental approach           | TTS                                                                                |
| Laboratory                      | MUC                                                                                |
| Design                          | E3-E5                                                                              |
| Result of the splicing analysis | Not analyzable due to high level of alternative splicing of $\Delta 4$ in controls |

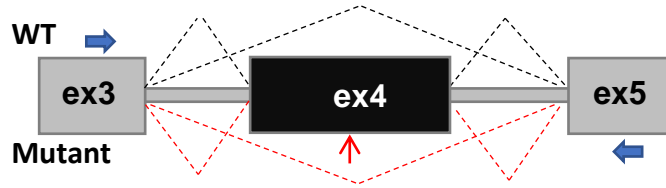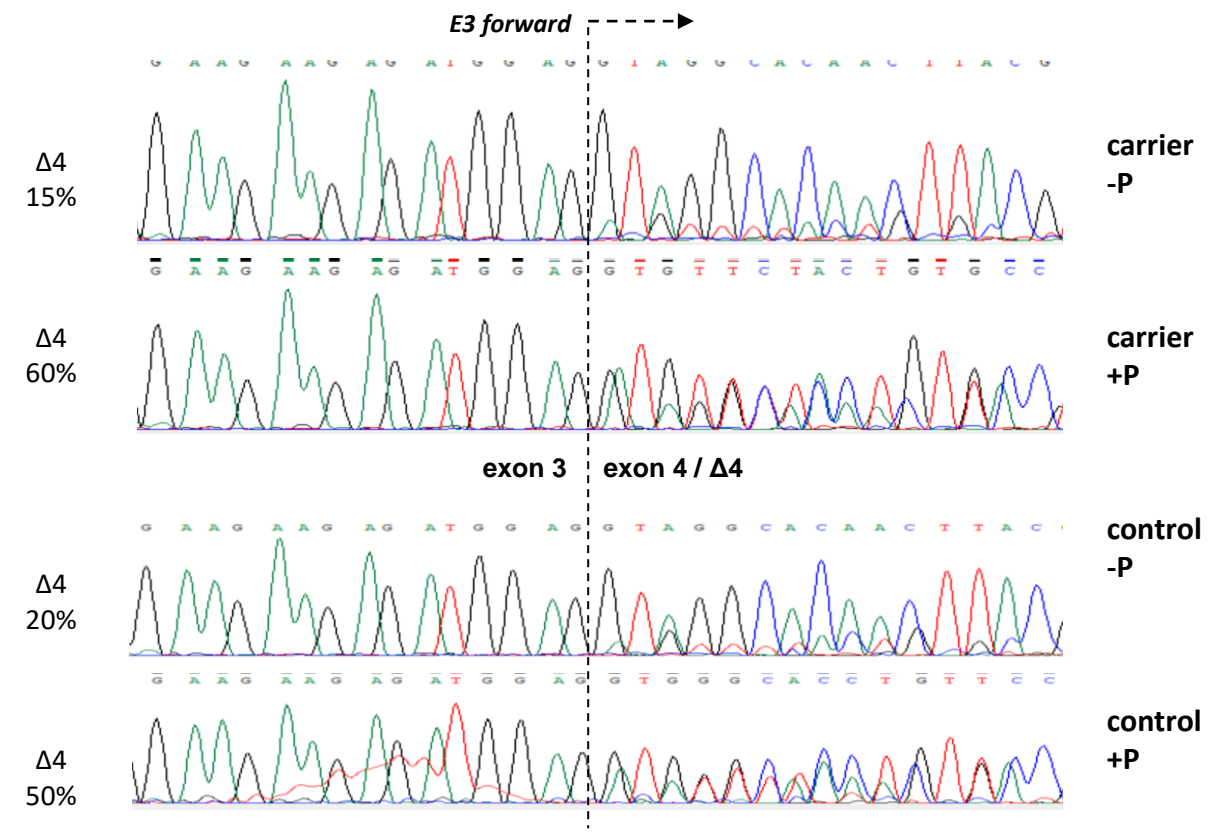

***MLH1* c.1039-2A>T**

|                                 |                                        |
|---------------------------------|----------------------------------------|
| Gene and variant                | <i>MLH1</i> c.1039-2A>T (IVS11)        |
| Experimental approach           | TTS                                    |
| Laboratory                      | BCN                                    |
| Design                          | E11-E15                                |
| Result of the splicing analysis | r.1039_1409del (p.Thr347Lysfs*8) = Δ12 |

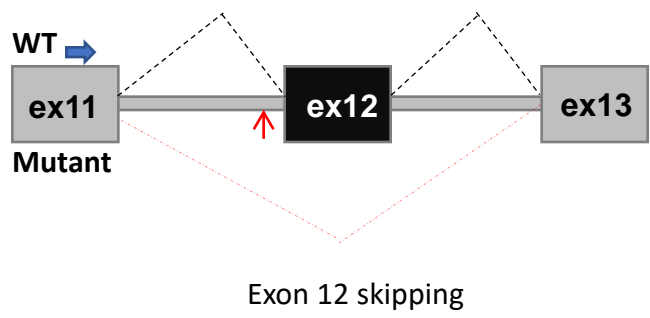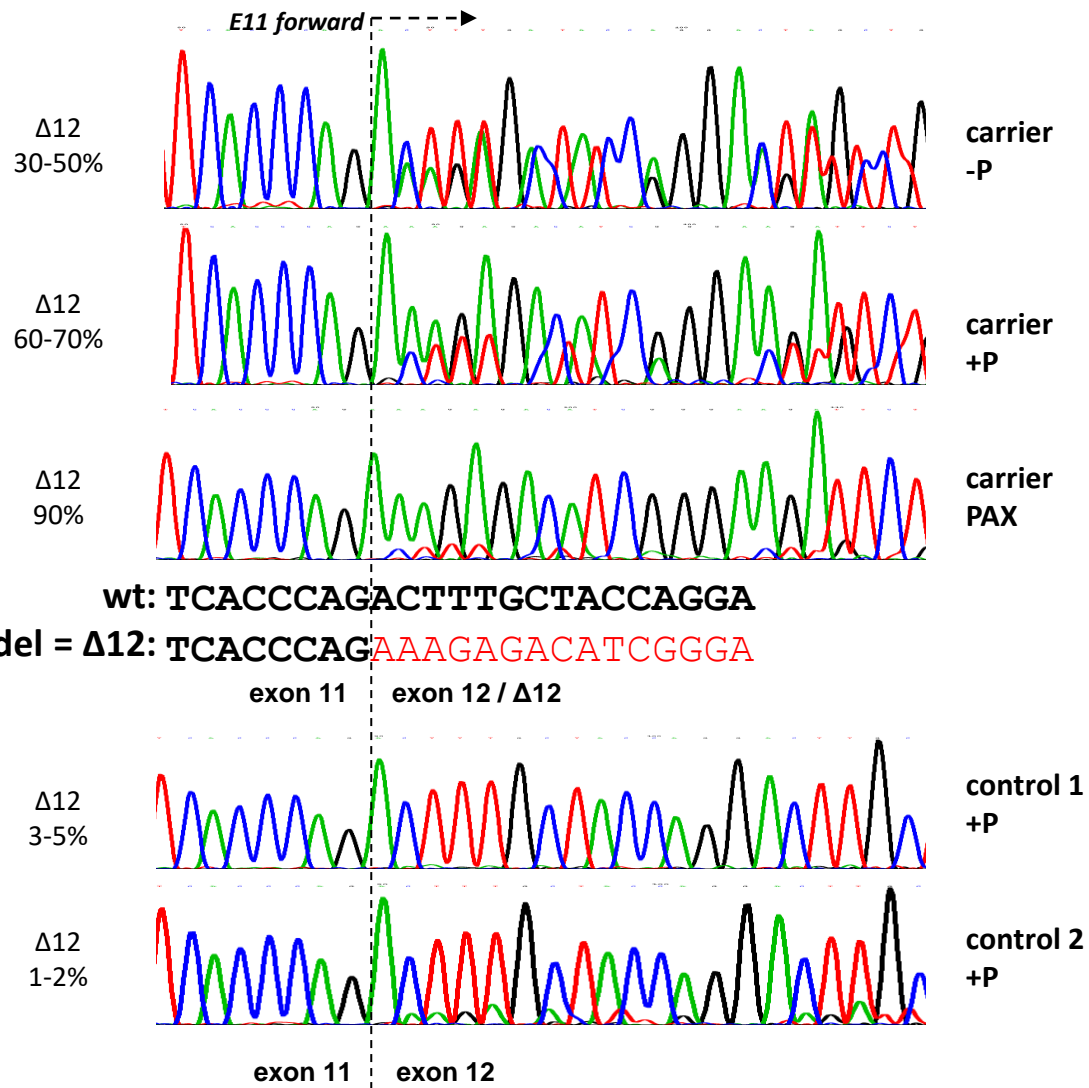

| Gene and variant                | <i>MLH1</i> c.1039-2A>T (IVS11)                                                                                                                                                     |
|---------------------------------|-------------------------------------------------------------------------------------------------------------------------------------------------------------------------------------|
| Experimental approach           | FLT                                                                                                                                                                                 |
| Laboratory                      | MUC                                                                                                                                                                                 |
| Design                          | E1-E19                                                                                                                                                                              |
| Result of the splicing analysis | r.1039_1409del (p.Thr347Lysfs*8) = Δ12<br>r.678_1409del (p.Glu227_Arg470del) = Δ9-12<br>r.885_1409del (p.Ser295_Pro469del) = Δ11-12<br>r.1039_1051del (p.Thr347Aspfs*16) = Δ12p(13) |

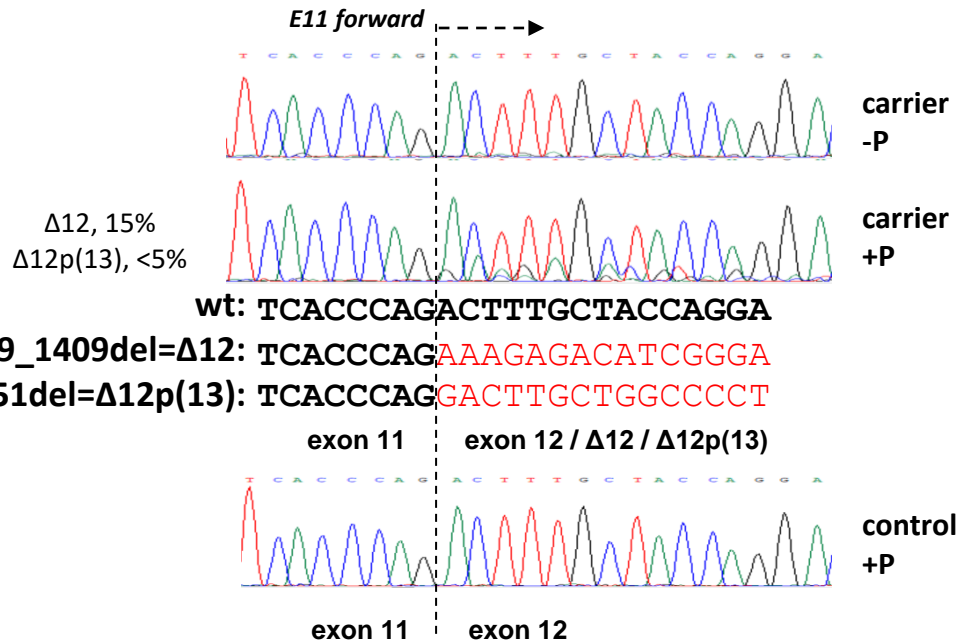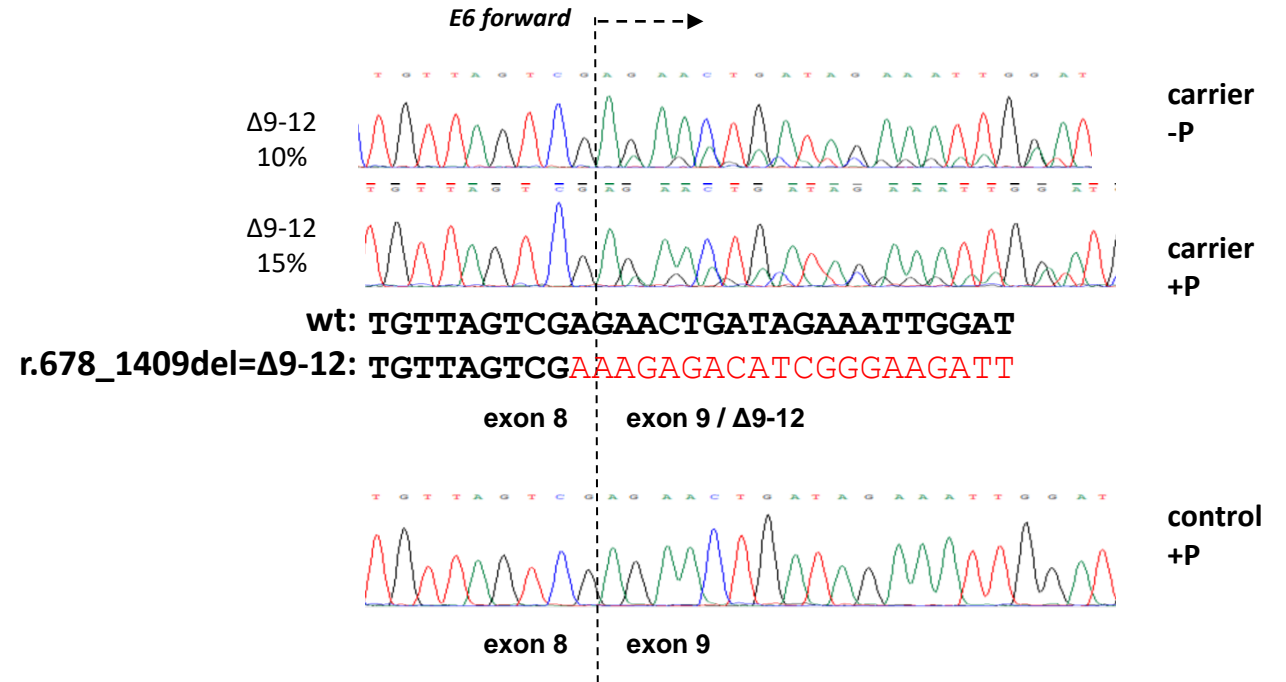

|                                 |                                        |
|---------------------------------|----------------------------------------|
| Gene and variant                | <i>MLH1</i> c.1039-2A>T (IVS11)        |
| Experimental approach           | TTS                                    |
| Laboratory                      | MUC                                    |
| Design                          | E10-E14                                |
| Result of the splicing analysis | r.1039_1409del (p.Thr347Lysfs*8) = Δ12 |

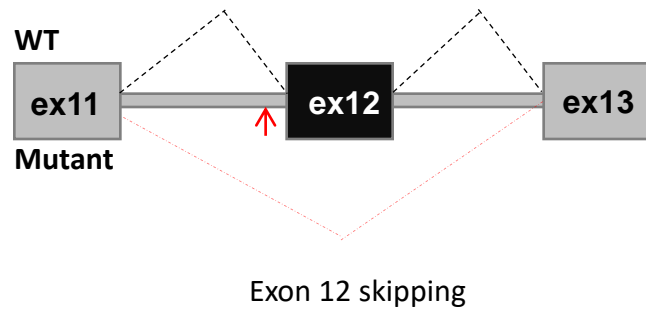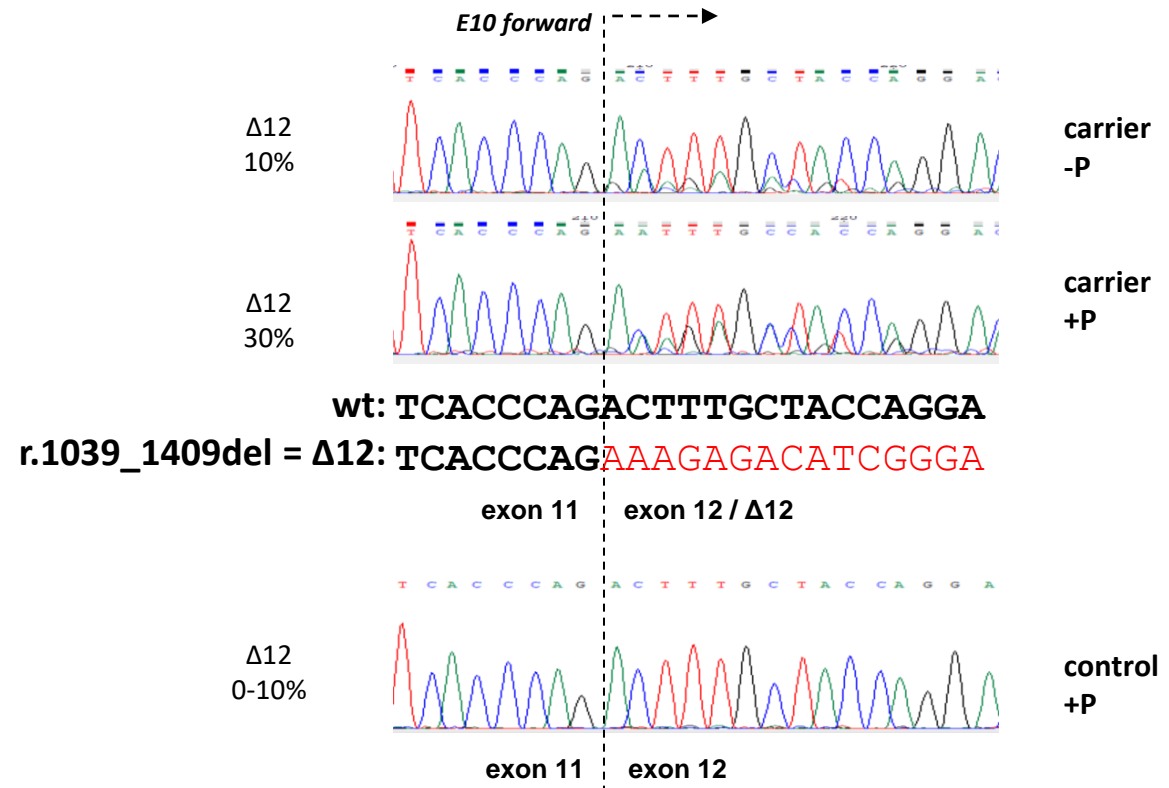

|                                 |                                                                                          |
|---------------------------------|------------------------------------------------------------------------------------------|
| Gene and variant                | <i>MLH1</i> c.1039-2A>T (IVS11)                                                          |
| Experimental approach           | Minigene                                                                                 |
| Laboratory                      | URO                                                                                      |
| Result of the splicing analysis | r.1039_1051del p.(Thr347Aspfs*16) = Δ12p(13) and r.1039_1409del, p.(Thr347Lysfs*8) = Δ12 |

### pCAS2.MLH1.ex12

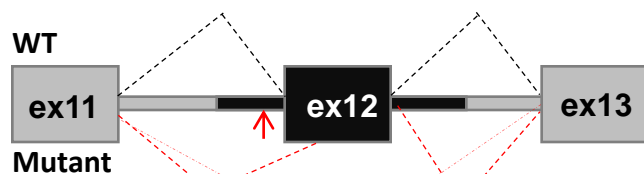

13-nt exonic deletion due to the use of a cryptic 3'ss and exon skipping

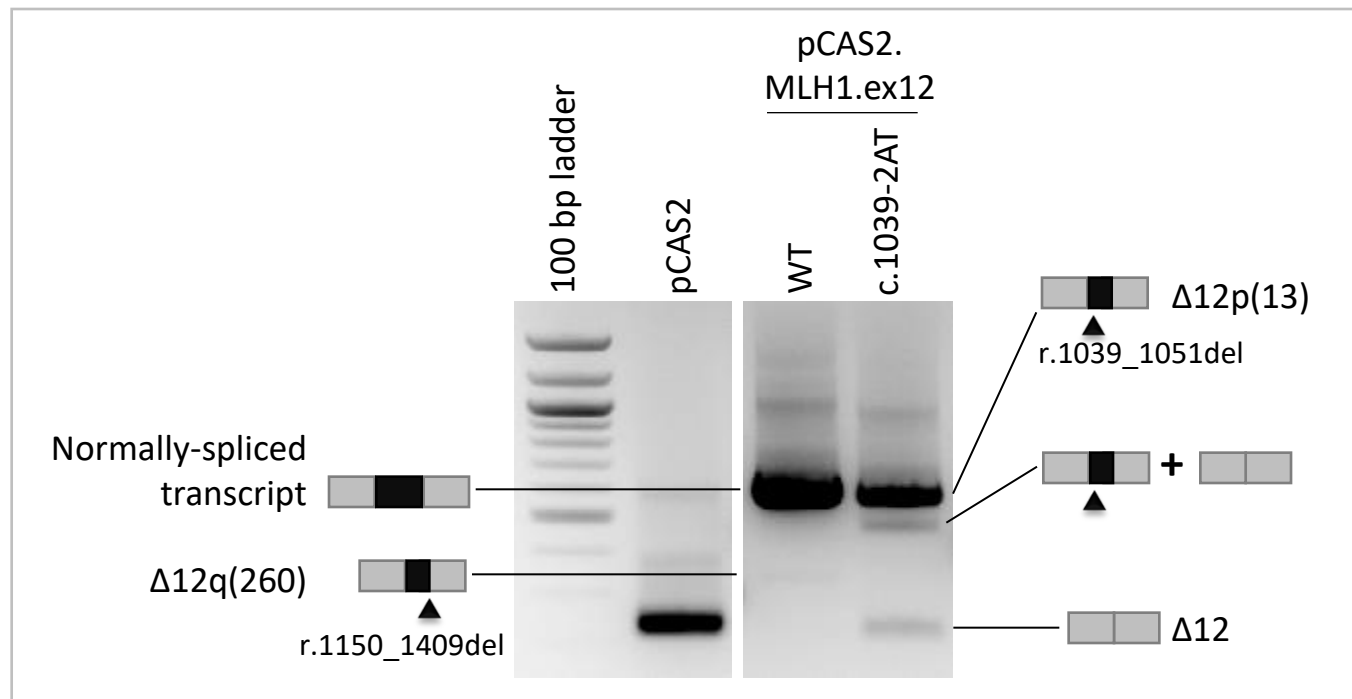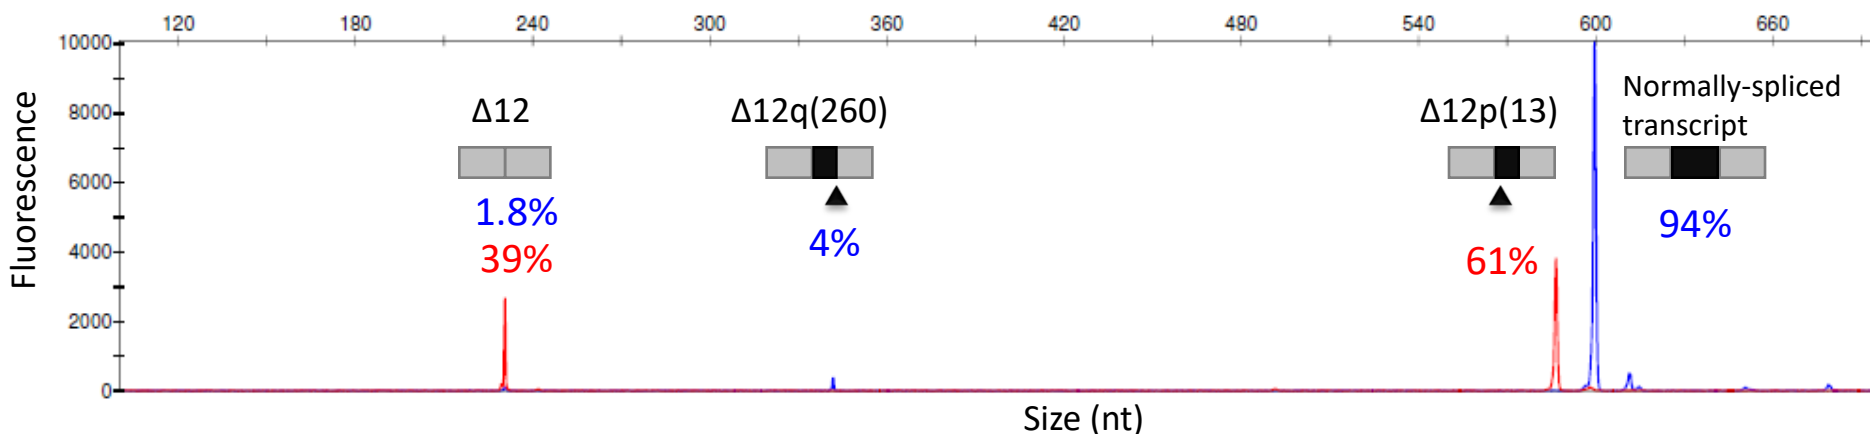

One representative electropherogram is shown. Peak areas were used to quantify the relative levels of each transcript, expressed as percentage, and correspond to the average of three independent experiments

WT  
c.1039-2A>T

***MLH1* c.1217G>A co-occurring with c.1989+3dup**



| Gene and variant                | <i>MLH1</i> c.1217G>A co-occurring with c.1989+3dup                    |
|---------------------------------|------------------------------------------------------------------------|
| Experimental approach           | TTS                                                                    |
| Laboratory                      | BCN                                                                    |
| Design                          | E11-E15                                                                |
| Result of the splicing analysis | No effect on splicing (r.1217G>A); biallelic expression of the variant |

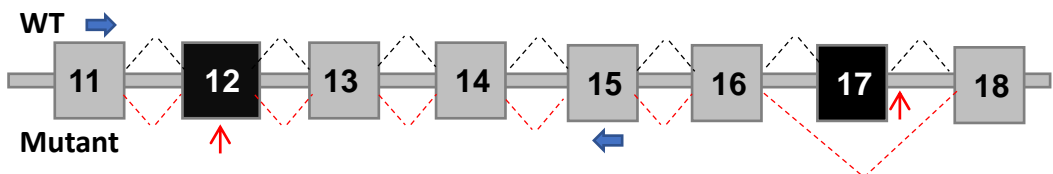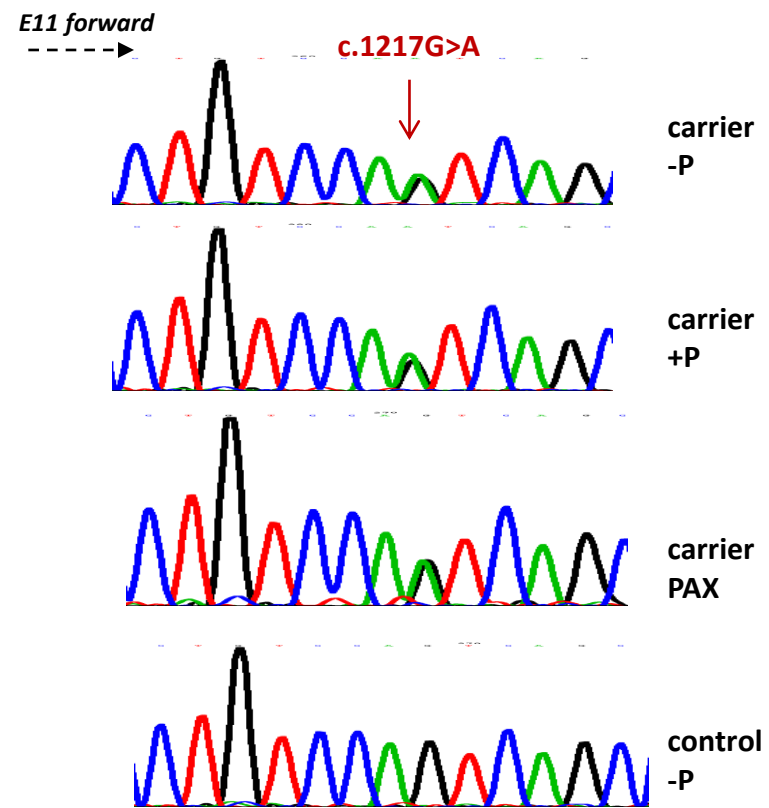

| Gene and variant                | <i>MLH1</i> c.1217G>A co-occurring with c.1989+3dup                     |
|---------------------------------|-------------------------------------------------------------------------|
| Experimental approach           | TTS                                                                     |
| Laboratory                      | MUC                                                                     |
| Design                          | E11-E17                                                                 |
| Result of the splicing analysis | No effect on splicing; monoallelic expression of the variant in exon 12 |

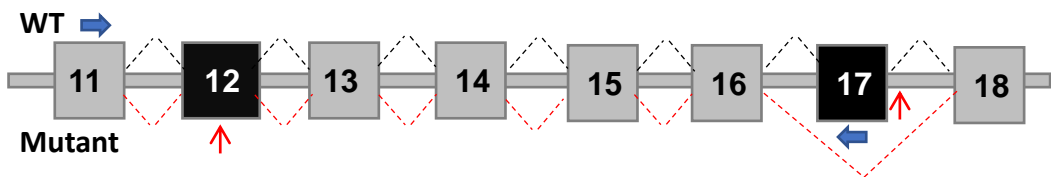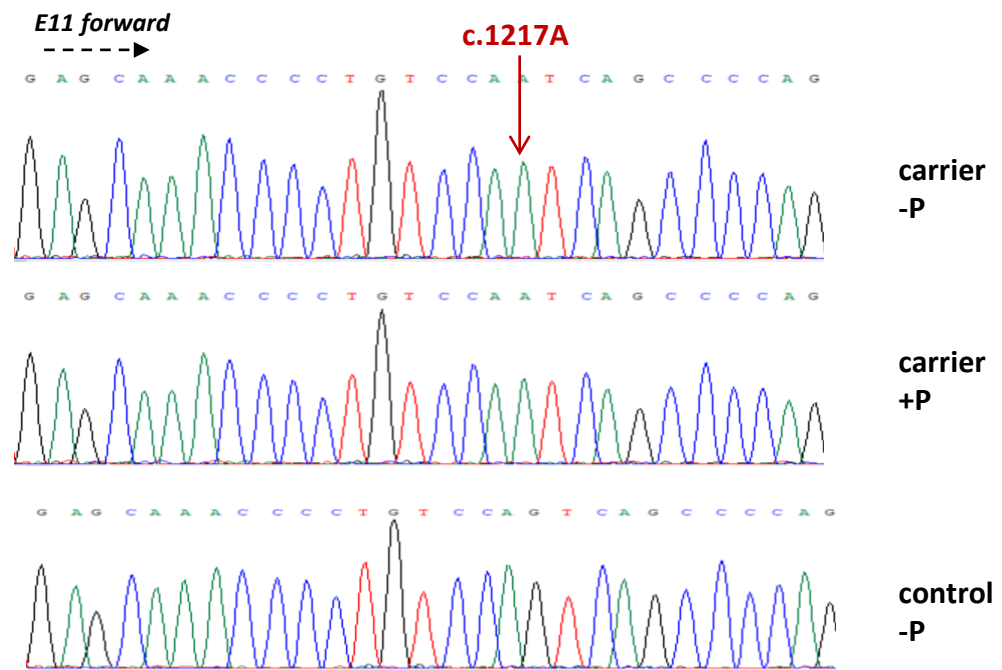

|                                 |                                                     |
|---------------------------------|-----------------------------------------------------|
| Gene and variant                | <i>MLH1</i> c.1217G>A co-occurring with c.1989+3dup |
| Experimental approach           | TTS                                                 |
| Laboratory                      | BCN                                                 |
| Design                          | E15-E19                                             |
| Result of the splicing analysis | r.1897_1989del (p.Glu633_Glu663del) = Δ17           |

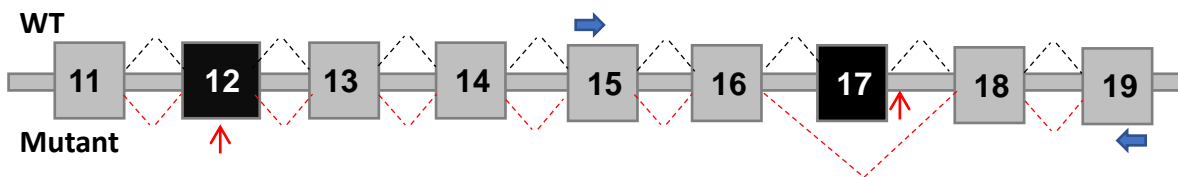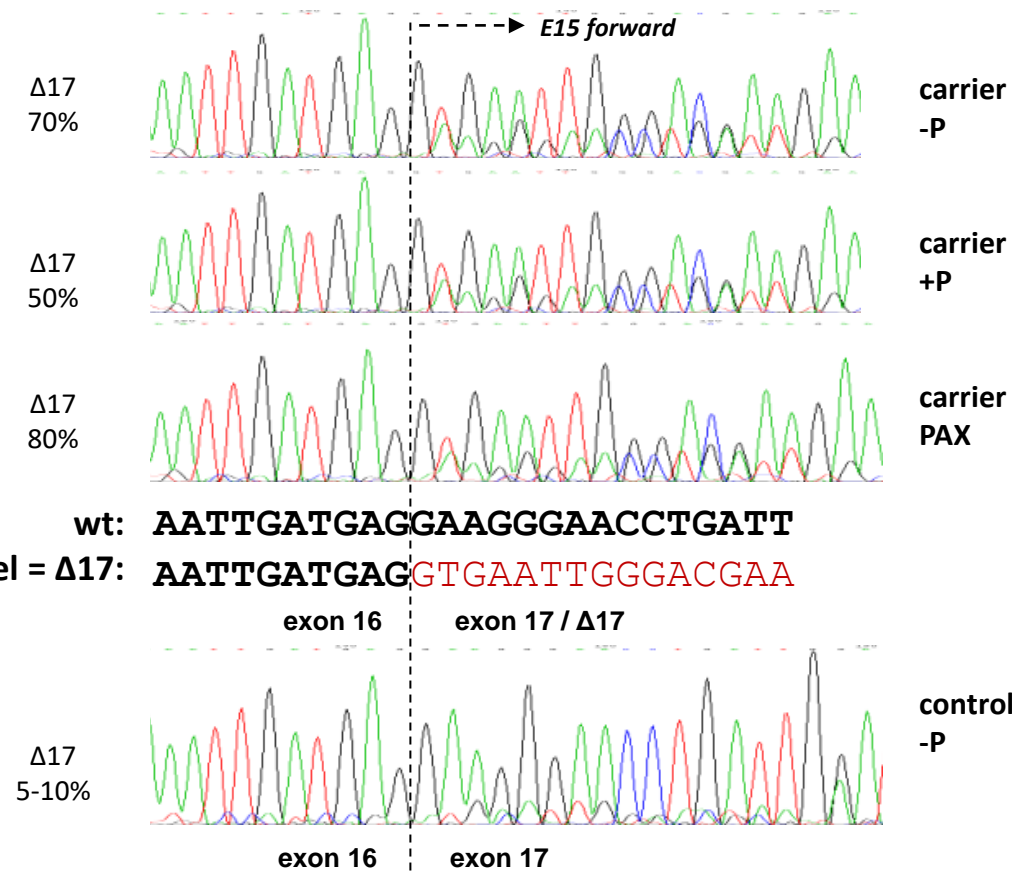

|                                 |                                                                              |
|---------------------------------|------------------------------------------------------------------------------|
| Gene and variant                | <i>MLH1</i> c.1217G>A co-occurring with c.1989+3dup                          |
| Experimental approach           | FLT                                                                          |
| Laboratory                      | MUC                                                                          |
| Design                          | E1-E19                                                                       |
| Result of the splicing analysis | r.1897_1989del = $\Delta 17$ ; biallelic expression of the variant c.1217G>A |

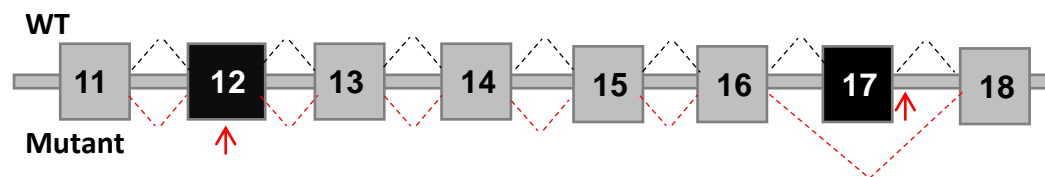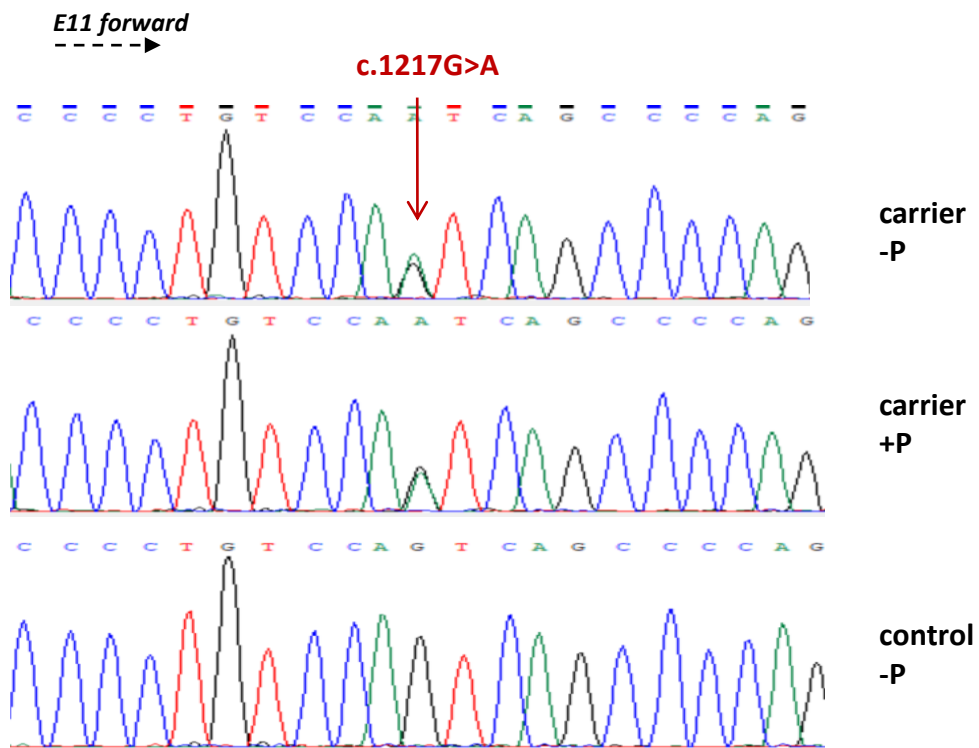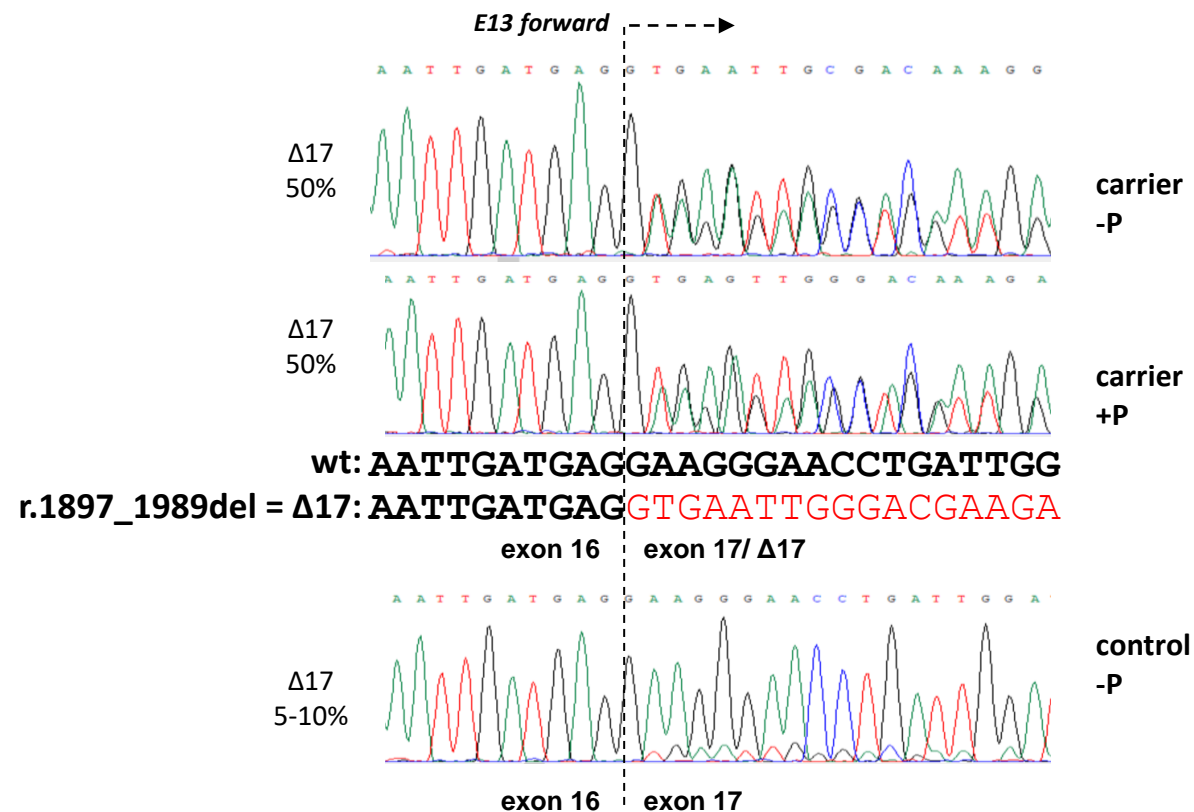

|                                 |                                                                                                                                         |
|---------------------------------|-----------------------------------------------------------------------------------------------------------------------------------------|
| Gene and variant                | <i>MLH1</i> c.1989+3dup (IVS17)                                                                                                         |
| Experimental approach           | Minigene                                                                                                                                |
| Laboratory                      | URO                                                                                                                                     |
| Result of the splicing analysis | 85% $\Delta$ 17, r.1897_1989del (p.Glu633_Glu663del) and 15% $\nabla$ 17q(32) r.1989_1990ins[1989+1_1989+31;1989+3dup] p.(Asn665Glnfs*) |

**pCAS2.MLH1.ex17-18**

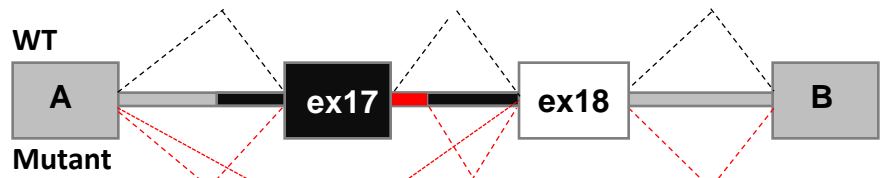

Exon skipping and 32-nt IVS17 retention due to the use of a cryptic 5'ss

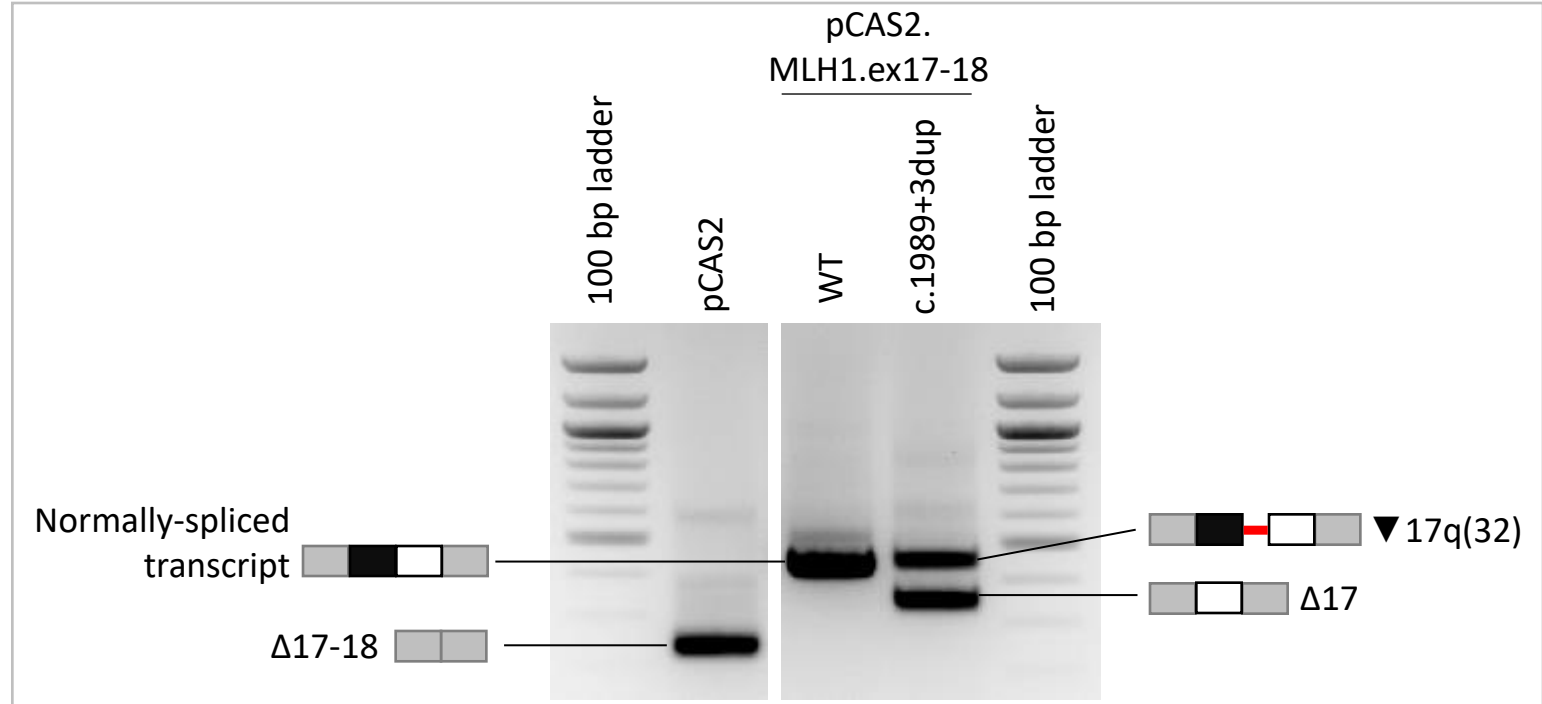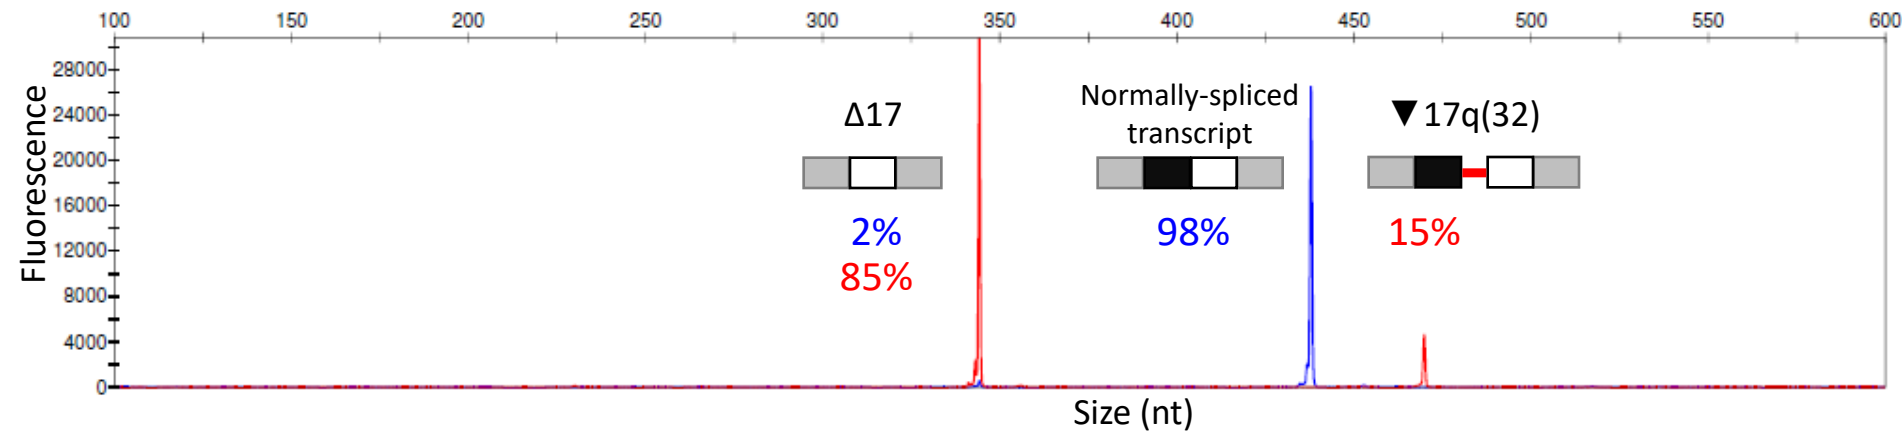

One representative electropherogram is shown. Peak areas were used to quantify the relative levels of each transcript, expressed as percentage, and correspond to the average of three independent experiments

WT  
c.1989+3dup
