# Supplementary material for: Splicing analyses for variants in MMR genes: best practice recommendations from the European Mismatch Repair Working Group
Source: PubMed Central journal article supplement (PMC9437034; doi:10.1038/s41431-022-01106-w), 2022-06-09
Supplement: 41431_2022_1106_MOESM5_ESM.pdf [file 41431_2022_1106_MOESM5_ESM.pdf]

# MSH2 c.211G>C

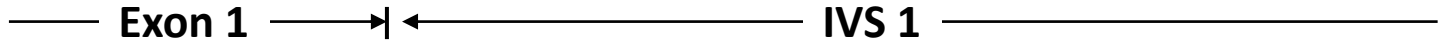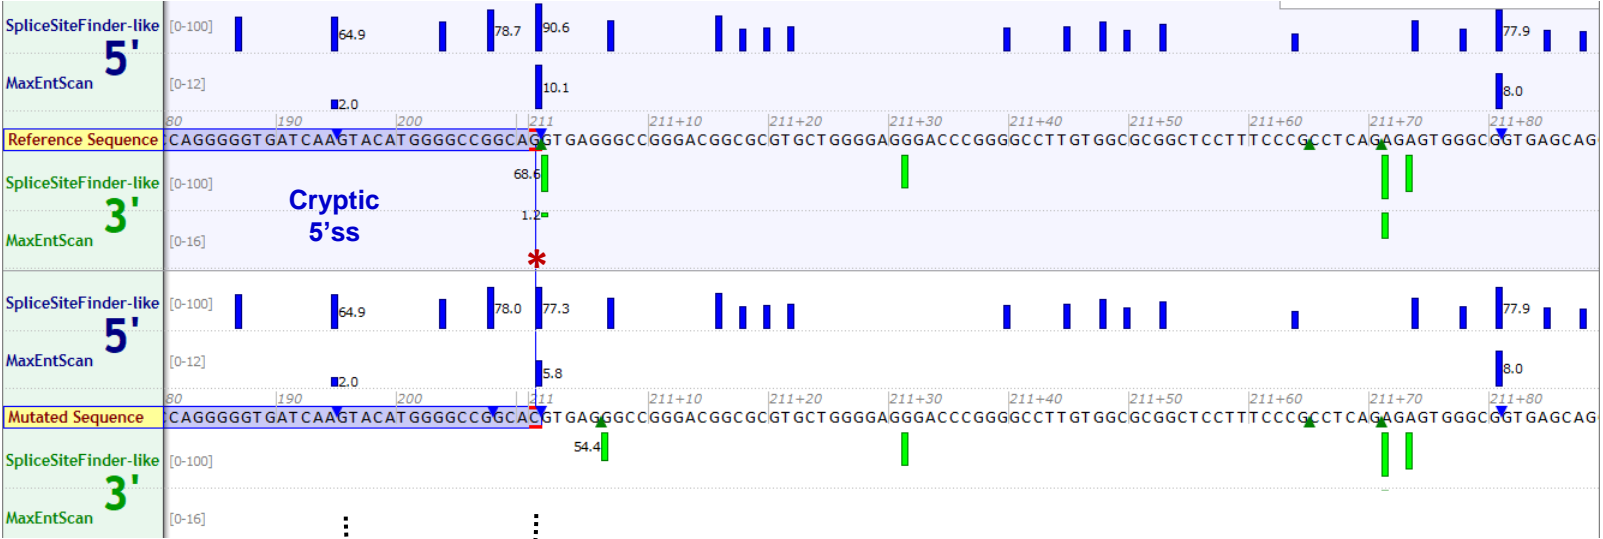

Cryptic 5'ss

17 nt  
r.195\_211

WT  
  
c.211G>C

\* affected reference splice site

# MSH2 c.1276G>A

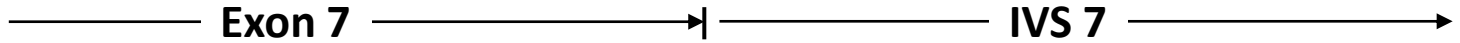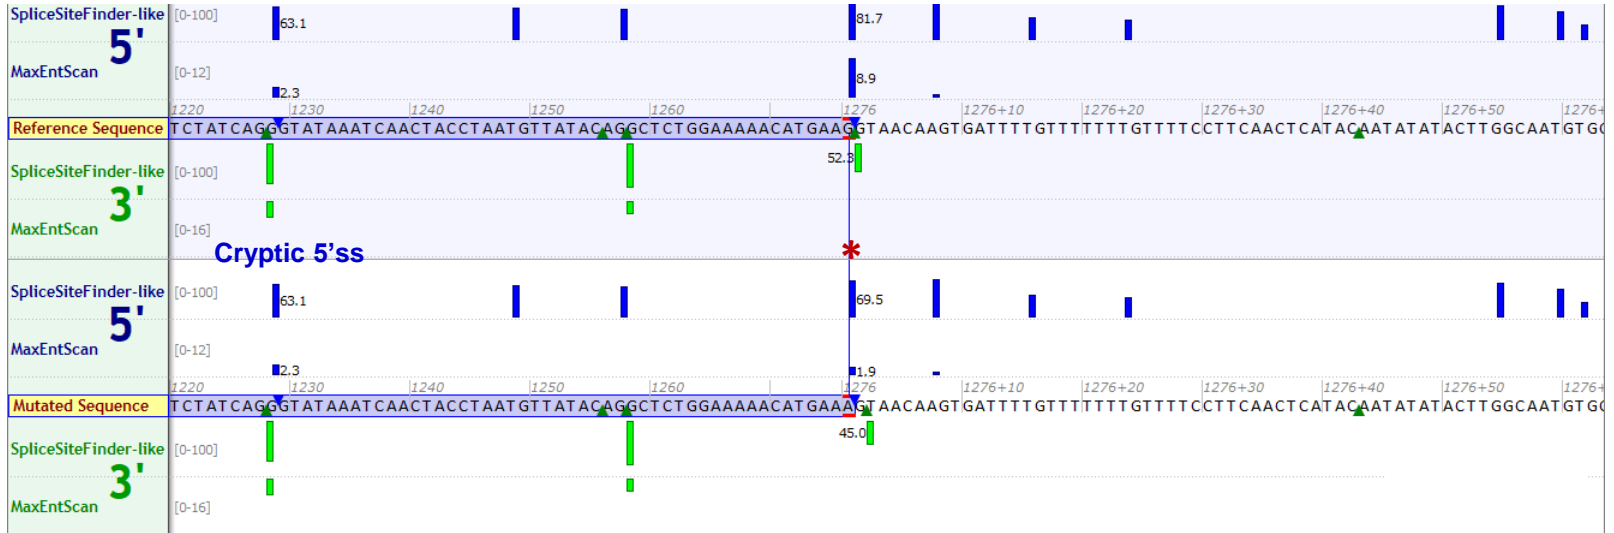

WT

c.1276G>A

Cryptic 5'ss

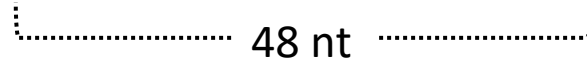

r.1229\_1276

\* affected reference splice site

# MSH2 c.2459-12A>G

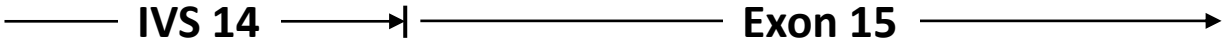

**WT**

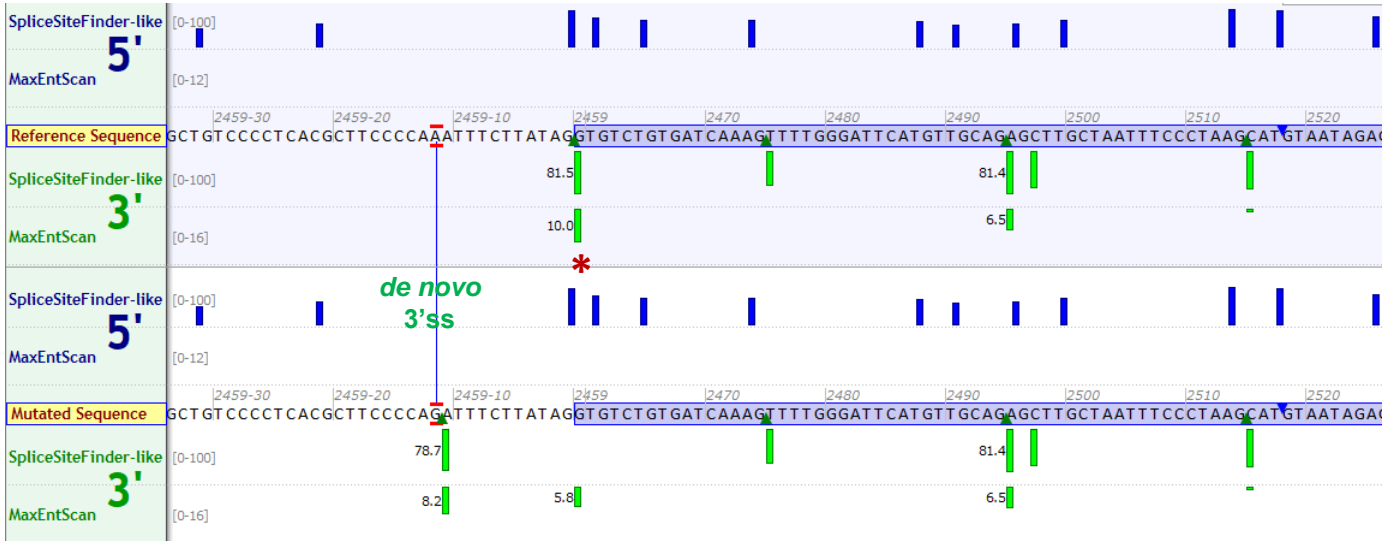

**c.2459-12A>G**

...11 nt...

r.2459-11\_r.2459-1

\* affected reference splice site

**MSH6 c.1894A>G**

← Exon 4 →

**WT**

**c.1894A>G**

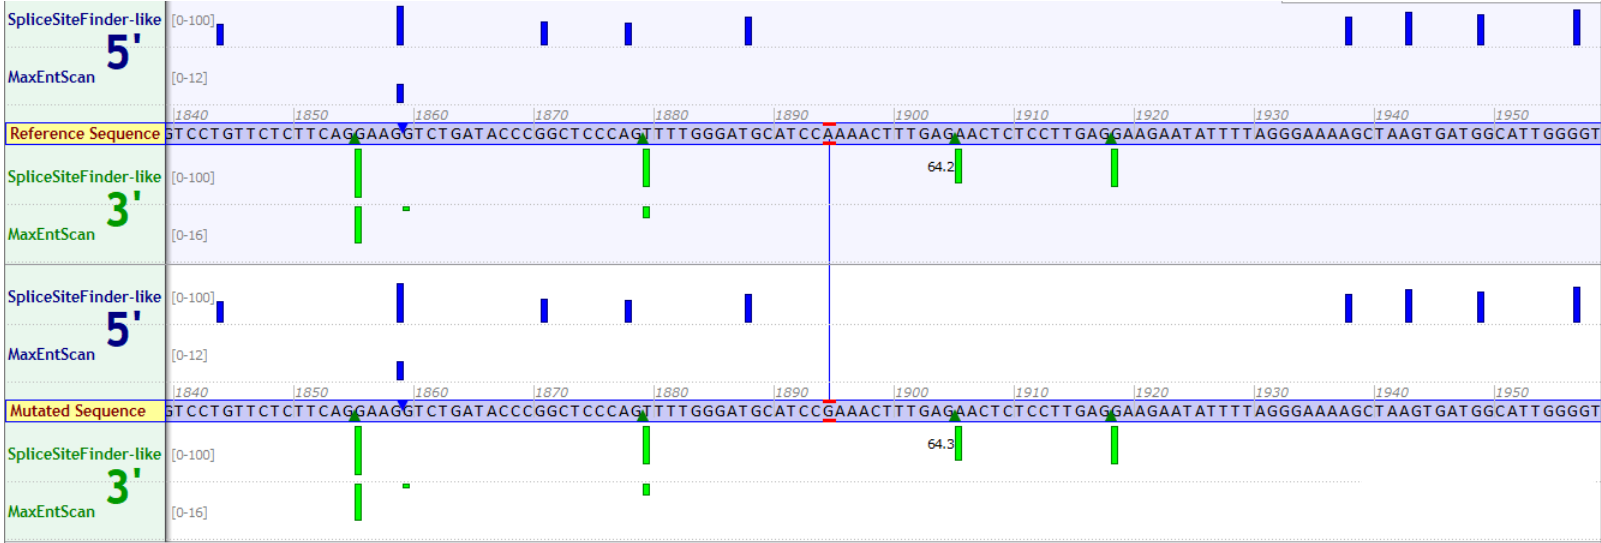

# MLH1 c.1039-2A>T

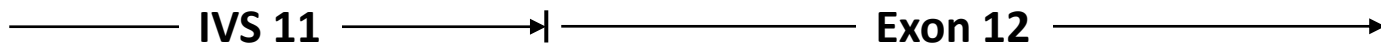

WT

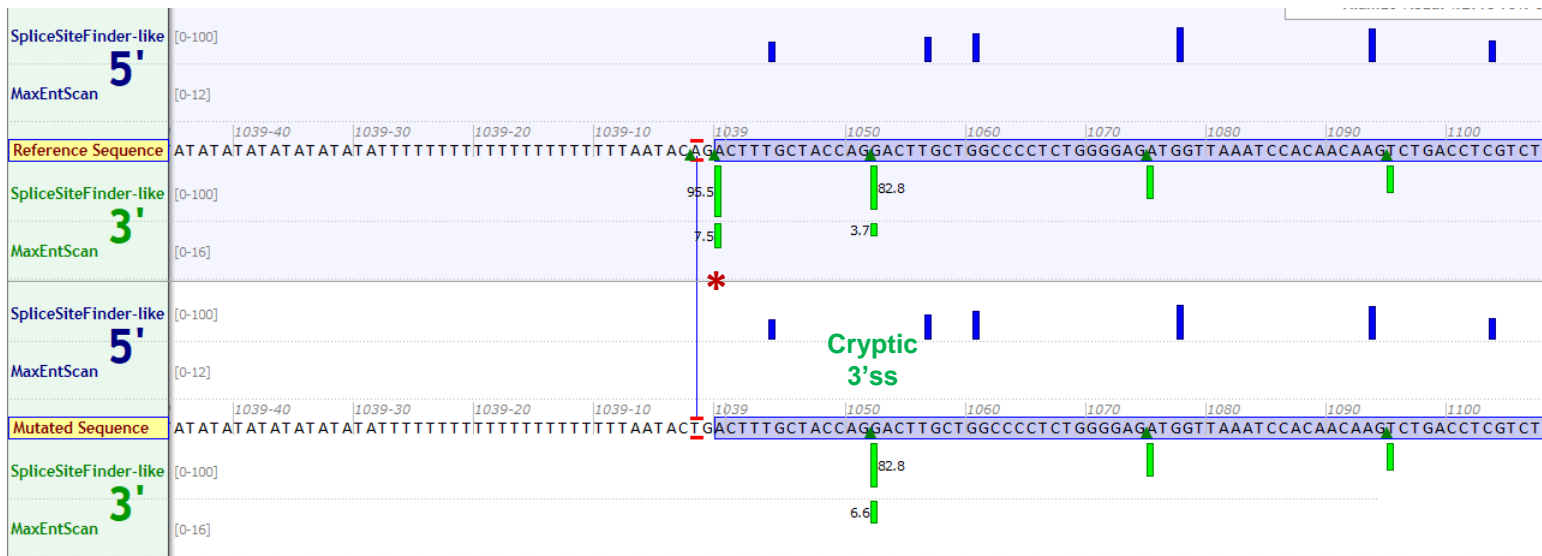

c.1039-2A>T

...13 nt...  
r.1039\_1051

\* affected reference splice site

# MLH1 c.1217G>A

## Exon 12

WT

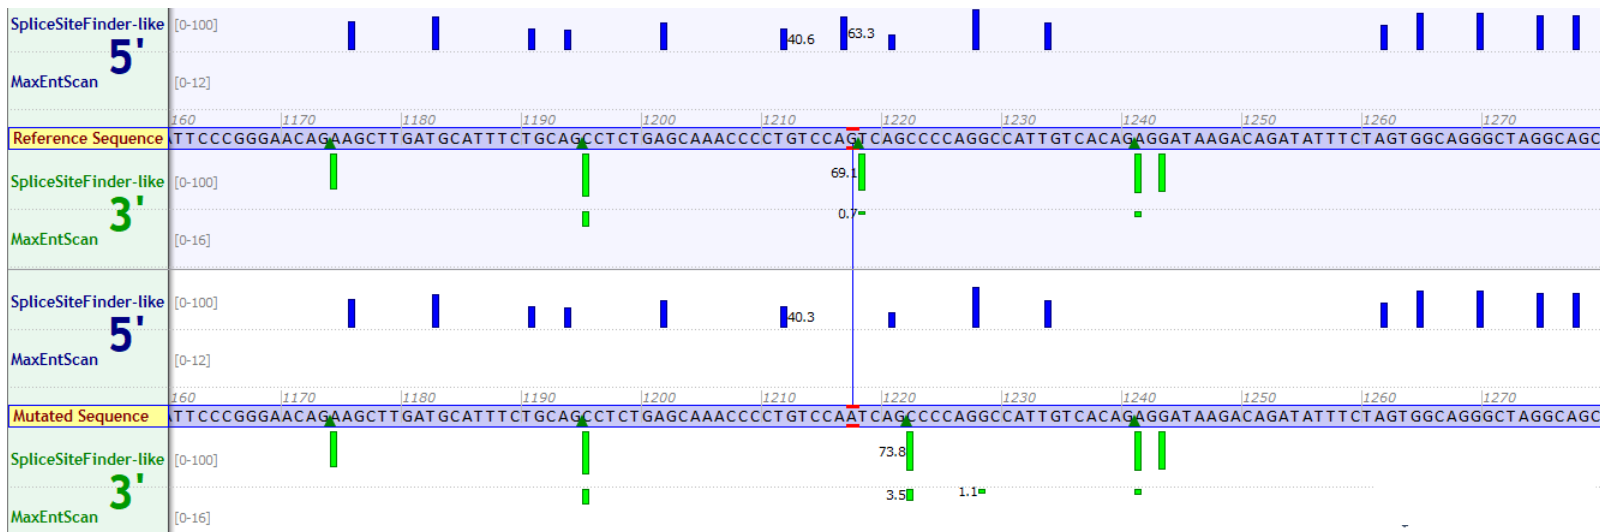

c.1217G>A

# MLH1 c.1989+3dup

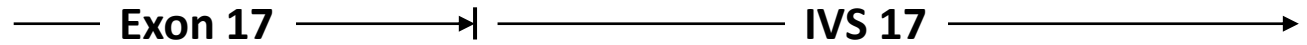

WT

c.1989+3dup

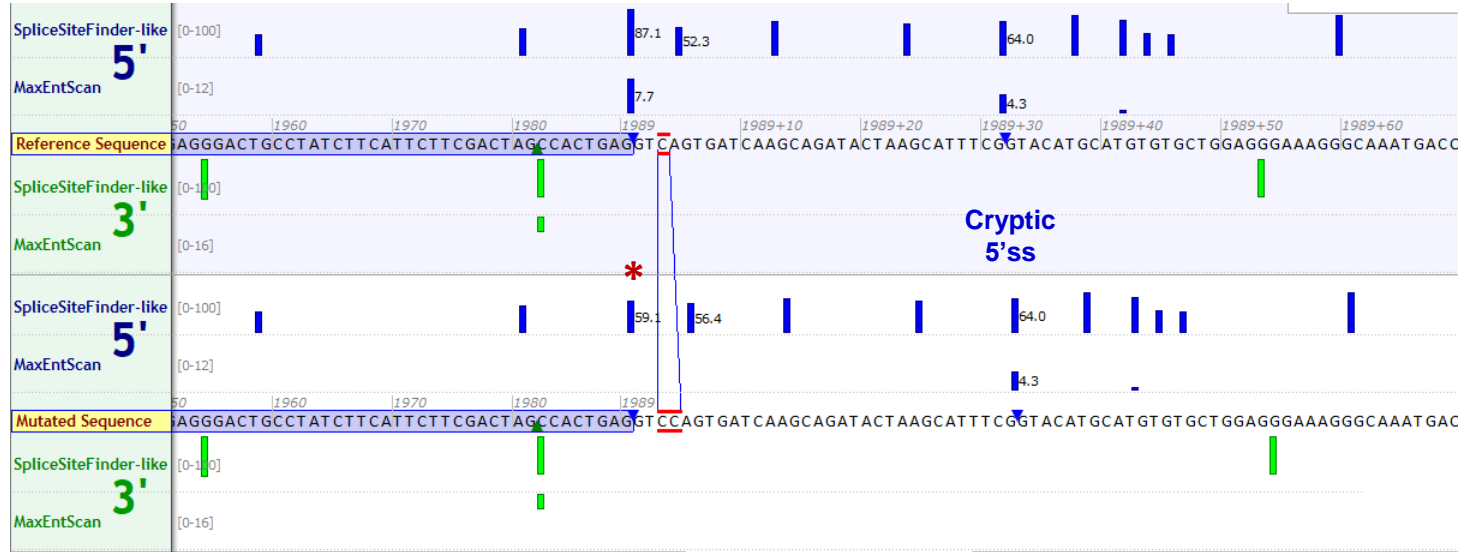

..... 31+1= 32 nt .....

r.1989+1\_ 1989+31; 1989+3dup

\* affected reference splice site
